# Supplementary material for: Well-being, physical fitness and health profile of 10–12 years old boys in relation to leisure-time sports club activities: a cross-sectional study
Source: PubMed Central journal article supplement — BMJ Open. 2021 Nov 30;11(11):e050194. doi: 10.1136/bmjopen-2021-050194 (PMC8634333; doi:10.1136/bmjopen-2021-050194), 2021-11-30
Supplement: bmjopen-2021-050194.draft_revisions.pdf [file bmjopen-2021-050194.draft_revisions.pdf]

# BMJ Open

BMJ Open is committed to open peer review. As part of this commitment we make the peer review history of every article we publish publicly available.

When an article is published we post the peer reviewers' comments and the authors' responses online. We also post the versions of the paper that were used during peer review. These are the versions that the peer review comments apply to.

The versions of the paper that follow are the versions that were submitted during the peer review process. They are not the versions of record or the final published versions. They should not be cited or distributed as the published version of this manuscript.

BMJ Open is an open access journal and the full, final, typeset and author-corrected version of record of the manuscript is available on our site with no access controls, subscription charges or pay-per-view fees (<http://bmjopen.bmj.com>).

If you have any questions on BMJ Open's open peer review process please email [info.bmjopen@bmj.com](mailto:info.bmjopen@bmj.com)

# BMJ Open

## Well-being, physical fitness and health profile of 10-12-year-old boys in relation to leisure-time sports club activities – a cross sectional study.

|                               |                                                                                                                                                                                                                                                                                                                                                                                                                                                                                                                                                                                                                                                                                                                                                                                                                                                                                                                                                                                                                                                                                                                                                                                                                                                                                                                    |
|-------------------------------|--------------------------------------------------------------------------------------------------------------------------------------------------------------------------------------------------------------------------------------------------------------------------------------------------------------------------------------------------------------------------------------------------------------------------------------------------------------------------------------------------------------------------------------------------------------------------------------------------------------------------------------------------------------------------------------------------------------------------------------------------------------------------------------------------------------------------------------------------------------------------------------------------------------------------------------------------------------------------------------------------------------------------------------------------------------------------------------------------------------------------------------------------------------------------------------------------------------------------------------------------------------------------------------------------------------------|
| Journal:                      | <i>BMJ Open</i>                                                                                                                                                                                                                                                                                                                                                                                                                                                                                                                                                                                                                                                                                                                                                                                                                                                                                                                                                                                                                                                                                                                                                                                                                                                                                                    |
| Manuscript ID                 | bmjopen-2021-050194                                                                                                                                                                                                                                                                                                                                                                                                                                                                                                                                                                                                                                                                                                                                                                                                                                                                                                                                                                                                                                                                                                                                                                                                                                                                                                |
| Article Type:                 | Original research                                                                                                                                                                                                                                                                                                                                                                                                                                                                                                                                                                                                                                                                                                                                                                                                                                                                                                                                                                                                                                                                                                                                                                                                                                                                                                  |
| Date Submitted by the Author: | 15-Feb-2021                                                                                                                                                                                                                                                                                                                                                                                                                                                                                                                                                                                                                                                                                                                                                                                                                                                                                                                                                                                                                                                                                                                                                                                                                                                                                                        |
| Complete List of Authors:     | Larsen, Malte ; University of Southern Denmark, Department of Sports Science and Clinical Biomechanics, Sport and Health Sciences Cluster<br>Madsen, Mads; University of Southern Denmark, Department of Sports Science and Clinical Biomechanics, Sport and Health Sciences Cluster<br>Cyril, Rasmus; University of Southern Denmark, Department of Sports Science and Clinical Biomechanics, Sport and Health Sciences Cluster<br>Madsen, Esben; University of Southern Denmark, Department of Sports Science and Clinical Biomechanics, Sport and Health Sciences Cluster;<br>University College Copenhagen, Institut for Terapeut- og Jordemoderuddannelser<br>Lind, Rune R.; University of Southern Denmark, Department of Sports Science and Clinical Biomechanics, Sport and Health Sciences Cluster<br>Ryom, Knud; Aarhus University Faculty of Health Sciences<br>Christiansen, Søren; Aarhus University, Department of Public Health<br>Elbe, Anne-Marie; Leipzig University Faculty of Sport Science, 5Institute of Sport Psychology and Physical Education<br>Krustrup, Peter; University of Southern Denmark, Department of Sports Science and Clinical Biomechanics; University of Exeter School of Sport and Health Sciences, Sport and Health Sciences, College of Life and Environmental Sciences |
| Keywords:                     | PUBLIC HEALTH, EDUCATION & TRAINING (see Medical Education & Training), MENTAL HEALTH                                                                                                                                                                                                                                                                                                                                                                                                                                                                                                                                                                                                                                                                                                                                                                                                                                                                                                                                                                                                                                                                                                                                                                                                                              |
|                               |                                                                                                                                                                                                                                                                                                                                                                                                                                                                                                                                                                                                                                                                                                                                                                                                                                                                                                                                                                                                                                                                                                                                                                                                                                                                                                                    |

SCHOLARONE™  
Manuscripts



I, the Submitting Author has the right to grant and does grant on behalf of all authors of the Work (as defined in the below author licence), an exclusive licence and/or a non-exclusive licence for contributions from authors who are: i) UK Crown employees; ii) where BMJ has agreed a CC-BY licence shall apply, and/or iii) in accordance with the terms applicable for US Federal Government officers or employees acting as part of their official duties; on a worldwide, perpetual, irrevocable, royalty-free basis to BMJ Publishing Group Ltd ("BMJ") its licensees and where the relevant Journal is co-owned by BMJ to the co-owners of the Journal, to publish the Work in this journal and any other BMJ products and to exploit all rights, as set out in our [licence](#).

The Submitting Author accepts and understands that any supply made under these terms is made by BMJ to the Submitting Author unless you are acting as an employee on behalf of your employer or a postgraduate student of an affiliated institution which is paying any applicable article publishing charge ("APC") for Open Access articles. Where the Submitting Author wishes to make the Work available on an Open Access basis (and intends to pay the relevant APC), the terms of reuse of such Open Access shall be governed by a Creative Commons licence – details of these licences and which [Creative Commons](#) licence will apply to this Work are set out in our licence referred to above.

Other than as permitted in any relevant BMJ Author's Self Archiving Policies, I confirm this Work has not been accepted for publication elsewhere, is not being considered for publication elsewhere and does not duplicate material already published. I confirm all authors consent to publication of this Work and authorise the granting of this licence.

1  
2  
3  
4 **Well-being, physical fitness and health profile of 10-12-year-old boys in relation**  
5 **to leisure-time sports club activities – a cross sectional study.**  
6  
7  
8  
9

10 Malte N. Larsen<sup>1</sup>, Mads Madsen<sup>1</sup>, Rasmus Cyril<sup>1</sup>, Esben Elholm Madsen<sup>1,2</sup>, Rune R. Lind<sup>1,3</sup>, Knud  
11 Ryom<sup>4</sup>, Søren Riis Christiansen<sup>4</sup>, Anne-Marie Elbe<sup>5</sup> and Peter Krstrup<sup>1</sup>  
12  
13

14  
15 *<sup>1</sup>Department of Sports Science and Clinical Biomechanics, Sport and Health Sciences Cluster*  
16 *(SHSC), University of Southern Denmark, Odense, Denmark; <sup>2</sup>Department of Physiotherapy and*  
17 *Occupational Therapy, University College Copenhagen; <sup>3</sup>Divisionsforeningen, Brøndby,*  
18 *Denmark; <sup>4</sup>Department of Public Health, Aarhus University <sup>5</sup>Institute of Sport Psychology and*  
19 *Physical Education, Faculty of Sport Science, Leipzig University, Leipzig, Germany*  
20  
21  
22  
23  
24  
25  
26

27 Short title: Well-being and health profile in sports club active boys  
28  
29

30 Key words: Physical activity, Football, Team Handball, Gymnastics, Swimming  
31  
32

33  
34 Corresponding author:  
35  
36

37 Malte Nejst Larsen  
38 Department of Sports Science and Clinical Biomechanics  
39 University of Southern Denmark  
40 Campusvej 55, 5230 Odense M, Denmark  
41 Email: mnlarsen@health.sdu.dk  
42 Phone: + 45 40304689  
43  
44  
45  
46  
47  
48  
49  
50  
51  
52  
53  
54  
55  
56  
57  
58  
59  
60

## ABSTRACT:

**OBJECTIVES:** Physical activity is associated with health benefits for children. This study investigated the correlation between sports club activities and well-being and physical health parameters in 10-12-yr-old Danish boys. **DESIGN:** Cross-sectional **SETTING:** Danish schools. **PARTICIPANTS:** 2,293 boys took part in the study. **PRIMARY AND SECONDARY OUTCOME MEASURES:** Questionnaires on participation in sports clubs and well-being and testing of physical health profile with measurements of body composition, resting heart rate (RHR), blood pressure and postural balance, jump and Yo-Yo IR1C performance was conducted. Data were analysed by participation in sport and according to the five most frequently reported sports. **RESULTS:** Boys enrolled in sports clubs had higher physical well-being ( $51.7\pm 9.7$  vs  $45.9\pm 8.7$ ), psychological well-being ( $53.3\pm 9.6$  vs  $51.4\pm 10.0$ ), experienced more peer and social support ( $50.9\pm 9.9$  vs  $48.0\pm 11.6$ ) and perceived a more positive school environment ( $48.6\pm 7.5$  vs  $45.9\pm 8.1$ ), than boys not involved in sports clubs. In addition, they showed better Yo-Yo IR1C (+46%), long-jump (9%) and balance test performance (+20%). The sports club active boys had higher relative muscle mass (+6%) and lower fat-% (-3%), BMI (-6%) and RHR (-5%) compared to boys not involved in sports clubs ( $p<0.05$ ). Boys enrolled in football clubs had higher aerobic fitness compared to boys not active in clubs (+11%), handballers (+5%), swimmers (+8%) and badminton players (+7%). Moreover, the boys enrolled in football clubs had lower fat-% (-17%) and higher relative muscle mass (+4%) than swimmers. **CONCLUSION:** Boys participating in club-based sports showed markedly higher levels of well-being and better Physical health profiles than boys not involved in sports club activities did. Footballers had superior aerobic fitness and body composition compared to those active in other sports. Results suggest that sports club activities seem to be beneficial for young boys' well-being, fitness and physical health profile, with highest benefits being achieved by boys involved in football.

## ARTICLE SUMMARY

### *Strengths and limitations*

- The large number of participants which makes it possible to evaluate the differences in well-being and physical health profile from the five most popular sport activities among boys.
- Even though the number of participants in each sports group was different, the groups were still large with a minimum of 79 participants.

- Most areas of the country are represented, with schools from both larger and smaller cities, as well the countryside.
- The cross-sectional design is not able to detect causal relations but gives a snapshot of the results. Furthermore, we did not collect data on the boys' everyday activities, such as active transport, or other social or physical activities, which have a bearing on the daily level of activity and might therefore affect both well-being and physical health.
- Neither do we have any data on how long the boys have participated in sports club activities. More years in a sports club are probably more beneficial to well-being and physical health.

## BACKGROUND:

Physical activity (PA) is strongly associated with physiological and mental health benefits for children and adolescents<sup>1,2</sup>, and sports clubs are important arenas for children to be physically active. PA significantly contributes to children's health status which is defined by the WHO as "*a state of complete physical, mental and social well-being and not merely the absence of disease or infirmity.*"<sup>3</sup> The literature shows that being overweight in childhood and adolescence is associated with reduced quality of life, especially with regard to physical and psychological well-being, social support and school related well-being. The risks of reduced quality of life due to poor well-being is comparable to that of diseases such as diabetes and other chronic conditions<sup>4</sup>, so it is of great relevance to prevent overweight e.g. by being active in sports<sup>5</sup> as well as looking at other aspects of physical health status and well-being since health status is strongly related to quality of life<sup>6</sup>. Sports club participation in popular sports is associated with physical and mental health in Danish 10-12 year old girls<sup>7</sup>. However, comparable studies focusing on boys and their most popular sports are lacking. It is therefore of great relevance to investigate whether well-being is associated with sports participation among 10-12-year-old boys. The age group is of interest, since physical activity in general decreases during the preteen age, and health status is related to the risk of different lifestyle diseases in adulthood<sup>2</sup>.

Participating in a leisure-time sport increases PA in general but also increases PA in settings outside of the particular leisure time sport. A study by Nielsen et al. (2016) compared the daily activity level of children participating in different leisure-time sports activities and children with no leisure-time sports club participation. They found that children who played football in a sports club (even those who trained only once a week) had a higher daily level of moderate and vigorous PA and that half

1  
2  
3  
4 of the difference could be explained by higher activity levels during school time<sup>8</sup>. Children active in  
5 other leisure time sports than football also showed increased PA levels during school breaks and spare  
6 time, but only when the children had at least two training sessions per week outside of school. Higher  
7 overall PA during school time, however, was not registered among children from other sports than  
8 football.  
9  
10  
11  
12

13  
14 There are a few studies investigating the association between sports participation and health profile in  
15 boys. A cross-sectional study by Wold et al.<sup>9</sup> compared a population of football players with an age-  
16 representative reference population. The results of the study show that the football population in  
17 general shows better self-assessed health. This is also found in a pilot study of the present study which  
18 shows that boys participating in sports in general and football in particular have a better overall health  
19 profile compared to the boys not active in sports clubs<sup>10</sup>.  
20  
21  
22  
23  
24  
25

26  
27 One way in which sports participation can impact well-being is via the motivational climate that is  
28 created by the coach, often seen in team sports<sup>11 12</sup>. If a motivational sporting climate satisfies players'  
29 basic psychological needs for autonomy, competence and social relatedness as outlined in Deci and  
30 Ryan's Self Determination Theory<sup>13</sup> (SDT) then well-being can be ensured. A study by Alvarez et  
31 al., for example, showed how football training which emphasized the process rather than the result  
32 could positively impact player's psychological well-being and the participants' motivation<sup>14</sup>. A  
33 process-oriented environment focusses on individual effort and development rather than on the result.  
34 It also lays importance on community and cooperation between participants<sup>14</sup> and thereby satisfies  
35 participants' basic psychological needs.  
36  
37  
38  
39  
40  
41  
42  
43

44 The aim of the present study is to investigate the association between participation in leisure-time  
45 sports club activities and well-being and physical health parameters in 10-12-year-old Danish boys.  
46  
47  
48

## 49 METHODS:

50  
51

52 We investigated the association between various leisure-time sport activities and broad-spectrum  
53 physiological health, performance and well-being parameters in 10-12-year-old boys, by conducting  
54 a cross-sectional study using a multicomponent testing battery. The testing included measurements  
55 of cardiovascular fitness, body composition and functional capacity, and questionnaires including  
56  
57  
58  
59  
60

1  
2  
3  
4 biographical information, leisure-time sports activity and well-being. The testers were blinded to  
5 whether the boys were active in a sports club or not. The tests were performed in early autumn  
6 (August/September) or early spring (February, March or April). The present study was conducted  
7 from August 2016 to September 2018 as an integrated part of the nationwide “11 for Health in  
8 Denmark” project, with a specific focus on the baseline results of all participating boys. The study  
9 was conducted in collaboration with the Danish FA, who invited all danish schools by email and  
10 phone to participate in 11 for Health. The pupils on the participating schools were invited to take part  
11 in the scientific measurements in the project and the parents received detailed written and oral  
12 information about the study, any possible hazards, discomfort, and the option to withdraw at any time.  
13 Written informed parental consent was obtained for all participants. The study was approved by the  
14 Regional Committees on Health Research Ethics for Copenhagen and Southern Denmark (J.no H-  
15 16026885).

#### 26 *Patient and Public Involvement*

27 as an integrated part of the nationwide “11 for Health in Denmark” project, the public was involved  
28 in the development of the testing protocol through a sparing group led by the danish FA. All results  
29 will be distributed by e-mail to the participating schools, and disseminated through seminars for the  
30 relevant professionals and press releases targeting the relevant part of the public e.g. the parents.  
31  
32  
33  
34  
35

#### 36 *Sample*

37 Boys from the 157 participating schools geographically spread all over Denmark, were included in  
38 the study if they had written consent from their parents and filled out the questionnaire regarding  
39 sport participation. 2,293 subjects took part in the study, of which 1,854 boys were active in sports  
40 clubs and pooled into the all sport active group (ASA) while 439 were not active in sports clubs and  
41 were pooled into the non-sport active group (NSA). The ASA boys were on average active  $2.2 \pm 0.9$   
42 times a week with the following weekly attendance for each of the individual sports: Football (n=897)  
43  $2.5 \pm 0.8$  times per week, team handball (n=131)  $2.3 \pm 0.7$  times per week, gymnastics (n=85)  $1.6 \pm 0.8$   
44 per week, swimming (n=121)  $1.8 \pm 1.1$  per week and badminton (n=126)  $1.4 \pm 0.7$  per week. All data  
45 were collected at the participating schools during regular class hours from 157 schools geographically  
46 spread all over Denmark.  
47  
48  
49  
50  
51  
52  
53  
54  
55  
56

57 Insert Figure 1: Participants flow chart.  
58  
59  
60

1  
2  
3  
4  
5  
6  
7  
8  
9  
10  
11  
12  
13  
14  
15  
16  
17  
18  
19  
20  
21  
22  
23  
24  
25  
26  
27  
28  
29  
30  
31  
32  
33  
34  
35  
36  
37  
38  
39  
40  
41  
42  
43  
44  
45  
46  
47  
48  
49  
50  
51  
52  
53  
54  
55  
56  
57  
58  
59  
60

### *Questionnaires on leisure time sports activity and quality of life*

The participants' well-being was evaluated using a shortened version of the Danish KIDSCREEN-27 survey<sup>15</sup>. KIDSCREEN-27 has 27 items within five dimensions of "physical wellbeing" (5 items), "psychological well-being" (7 items), "autonomy and parent relation" (7 items), "peers and social support" (4 items) and "school environment" (4 items). The "autonomy and parent relation" scale was considered irrelevant to the aim of the present investigation and therefore left out to minimize the number of items. The items are rated on a 5-point Likert scale ranging from "never" to "always" or "not at all" to "extremely". Higher KIDSCREEN-27 scores designate better well-being. The KIDSCREEN-27 survey has shown very good reliability (Cronbach's alphas: 0.80–0.84) and high test-retest reliability<sup>15</sup>.

Leisure time sports activity, age and gender was asked in the questionnaires. The participants answered if they were enrolled in any leisure-time sport (yes/no). If yes, they were asked to report which sport they were involved in and the number of weekly training sessions. If they were active in more than one leisure-time sport, they were instructed to state the sport they did most often. This part of the questionnaire was a self-developed section, but based on a comparable questionnaire that has been used in previous studies in similar age groups<sup>10 16</sup>.

### *Resting blood pressure and HR*

In a supine position, three blood pressure measurements were taken at approximately one-minute intervals after 8 minutes of initial rest. The measurements were taken in a quiet room on the left upper arm with an automatic blood pressure monitor (M6 HEM-7223-E, Omron, Illinois, USA) with adjusted cuff size. If the first three systolic or diastolic blood pressure varied by more than 10 mmHg, an extra measurement was taken. Resting HR was measured at the same time by the automatic blood pressure monitor.

### *Body composition*

Body mass, muscle mass (kg) and body fat (%) were measured using an InBody 270 multifrequency body composition analyzer (Biospace, California, USA). The subjects were weighed barefoot and in

1  
2  
3  
4 light clothing. The validity and reliability of the InBody 270 compared to DXA-scanning in 127 10-  
5 12-yr old girls and boys, has shown interclass correlation of 0.99 for fat percentage and 0.97 for  
6 muscle mass<sup>-7</sup>. Height was measured with 0.1 cm precision using a Tanita Leicester portable  
7 altimeter (Tanita, Amsterdam, Netherlands).  
8  
9  
10

### 11 12 13 *Muscle Strength*

14  
15 Standing long jump performance was measured after a reduced version of the FIFA 11+ warm-up  
16 programme, including jumps, as described by Ørntoft et al. (2018). The participants performed two  
17 jumps separated by a 5-10-minute rest. The jumps were performed wearing sports shoes or with bare  
18 feet. The participants were standing still with their feet parallel and shoulder-width apart placing the  
19 toes just behind a line. The children were instructed to bend their knees to a 90-degree squat position  
20 with their hands placed on the hips and hold this position for 2 seconds before jumping as long as  
21 possible, still with their hands on their hips. The distance from the start line to the backheel was  
22 measured in centimeters. Each child had two tries 5-10 minutes apart: the longest jump was reported  
23 as the result. The standing long jump is valid test for children aged 6–17 years and is strongly  
24 associated with upper ( $r = 0.82-0.86$ ) and lower body ( $r = 0.69-0.85$ ) maximal muscle strength, and  
25 showed moderate-to high reliability<sup>17 18</sup>.  
26  
27  
28  
29  
30  
31  
32  
33  
34  
35

### 36 *Cardiovascular fitness*

37  
38 Running performance was evaluated by the YYIR1C. The test was performed indoors in a  
39 gymnasium. The test consisted of two 16-metre shuttle runs back and forth at progressively increasing  
40 speeds, separated by 10 seconds of jogging after each session of running, around a cone placed 4  
41 meters behind the start line. Each run was separated by a sound from an audio played through  
42 loudspeakers. The frequency of the beep sounds was increased throughout the test. The first time the  
43 participant failed to make the finish line in time, a warning was given; the second time, the test ended  
44 for the participant. Total running distance was recorded. Before the real test, the children got used to  
45 protocol with the test procedure by running the three initial shuttles (also worked as re-warm-up  
46 session before the test). Aerobic fitness was estimated from the running distance in the YYIR1C test  
47 by the equation:  $VO_2\max = 0.0116x + 42.3$  ml/min/kg, as described by Ahler et al. (2012). The test  
48 has been validated in 6 to 11-year-old children (CV for 9–11-year-old girls: untrained CV=10.1%,  
49 football playing girls CV=11.5%)<sup>19 20</sup>.  
50  
51  
52  
53  
54  
55  
56  
57  
58  
59  
60

### *Balance test*

Postural balance was evaluated using the Stork Balance Stand test<sup>21</sup>. The children stood barefooted and positioned their hands on their hips, then placed the non-supporting foot at the inside knee of the supporting leg. Then they raised their heel to balance on the forefoot.

The time started as the heel was raised from the floor. The timer was stopped if: a) the hands left the hips, b) the supporting foot rotated or moved in any direction, c) the non-supporting foot lost connection with the knee, d) the heel of the supporting foot touched the floor. The Stork balance test has a high test-retest reliability in an fit adolescent population and is valid for evaluating postural balance in young adults<sup>21 22</sup>.

The above described psychological measurements were always performed in the same order, beginning with resting blood pressure, resting HR and InBody measurements followed by a uniform warm-up, a standing long jump length test and the YYIR1C. The testing was conducted by trained test personnel from the university, blinded to the children's sports club participation. They were assisted by educated teachers and/or pedagogues.

### *Statistical analysis*

Cronbach's alpha scores calculated with SPSS Statistic 25 (IBM SPSS Statistics, Chicago, IL, USA) were used to determine internal consistency of the four well-being scales. Mean and SD were calculated for all the test results, age and weekly frequency of participation in sports. Multiple linear regression in which age was adjusted for were used to analyze differences between boys active in sports clubs and inactive boys. The same statistical analysis was used to investigate differences between the five most popular sports, and here adjusted for both age and frequency of weekly participation<sup>23</sup>.

Data were analysed according to whether the boys participated in leisure-time sport and according to the five most frequently reported sports.

**RESULTS:** Boys enrolled in leisure-time sports clubs had higher physical well-being ( $51.7 \pm 9.7$  vs  $45.9 \pm 8.7$ ), psychological well-being ( $53.3 \pm 9.6$  vs  $51.4 \pm 10.0$ ), experienced more peer and social

1  
2  
3  
4 support (50.9±9.9 vs 48.0±11.6) and perceived a more positive school environment (48.6±7.5 vs  
5 45.9±8.1). The sports club active boys also had better Yo-Yo IR1C (+46%), long-jump (9%) and  
6 balance test performance (+20%) than boys not involved in leisure time sports clubs. The boys active  
7 in leisure-time sports clubs had higher relative muscle mass (+6%), lower fat percentage (-3%), BMI  
8 (-6%), RHR (-5%), compared to boys not involved in leisure-time sport ( $p<0.05$ ). Boys enrolled in  
9 football clubs had higher aerobic fitness compared to boys not active in leisure-time sports clubs  
10 (+11%), handball players (+5%), swimmers (+8%) and badminton players (+7%). Moreover, the boys  
11 enrolled in football clubs had lower fat percentage (-17%) and higher relative muscle mass (+4%)  
12 than swimmers. All results can be found in table 1 and 2.  
13  
14  
15  
16  
17  
18  
19  
20

21 INSERT TABLE 1 AND 2  
22  
23  
24  
25  
26  
27  
28  
29  
30  
31  
32  
33  
34  
35  
36  
37  
38  
39  
40  
41  
42  
43  
44  
45  
46  
47  
48  
49  
50  
51  
52  
53  
54  
55  
56  
57  
58  
59  
60

## DISCUSSION

The main finding in the present study was that boys participating in club-based leisure-time sports showed markedly higher levels of well-being and better fitness and health profiles than boys not involved in any sports club activities did. These findings are in line with previous findings from the 11 for health in Europe pilot study, as well as findings among younger boys in Denmark<sup>10 24</sup>. Boys involved in football had better aerobic fitness and better body composition compared to those active in other sports, which also was seen previously<sup>10</sup>. Although this cross-sectional study doesn't describe any causal effects of sports participation, it is interesting that those participating in football have a superior health and performance profile, as well as better well-being scores related to social support and positive school environment compared to other sports with similar training frequency. Since the study is cross-sectional, we cannot conclude what causes the differences, but the following section will suggest some possible explanations.

### *Well-being*

The boys who engaged in leisure time sports club activity had better physical and psychological well-being and reported higher peer and social support and a more positive school environment compared to the boys who were not active in leisure time sport activities. The better well-being for the active boys might be caused by a greater amount of MVPA, social activities connected to sports club participation, higher self-perception and self-worth as well as positive perception of the school environment. Parameters, and due to more and better social relations/connections (social capital). We have already discussed in a recent paper from the same study found the exact same differences in girls<sup>7</sup>.

For boys playing football, the relation to peers and social support was superior when compared to the non-sports group, which also confirms findings in girls. The benefits of team vs individual sports have been studied with different outcomes, but the overall psychological outcomes of team sports seem to be more advantageous compared to individual sports<sup>25</sup>. The feeling of a more positive school environment might be caused by the experiences that skilled players have in physical education class but especially also in school breaks, where sports/football is often played. This consequently also leads to more physical activity during school time for football players<sup>26</sup>. And, in addition, boys can experience satisfaction of the basic needs for autonomy, competence and social relatedness which could explain the higher well-being scores.

1  
2  
3  
4 In general the findings support the general assumption that participation in leisure time  
5 sports clubs is associated with higher well-being scores in children<sup>27 28</sup>.  
6  
7  
8  
9

### 10 11 12 *Performance measurements*

13 Performance in the YYIR1C is highly correlated with maximal oxygen uptake measured in the  
14 laboratory setting<sup>19</sup>. As cardiovascular fitness in children and adolescents affects risk factors for  
15 future BMI, body fat and metabolic syndrome, a good cardiovascular fitness is important for future  
16 health<sup>29</sup>. Boys doing leisure-time sport ran 58% further in the YYIR1C test, corresponding to 4.1  
17 ml/kg/min, than NSA boys, while boys playing football ran 85, 24, 51 and 64% further, corresponding  
18 to 6.1, 2.6, 4.4 and 4.1 ml/kg/min respectively, compared to NSA subjects, handball players,  
19 swimmers and badminton players. That boys participating in leisure-time sports have greater  
20 cardiovascular fitness than non-active boys was also found in previous small-scale studies in 8 to 12-  
21 year-old boys<sup>10 16</sup>. Furthermore, the analysis of the five sports in this study reveals that boys playing  
22 football had higher cardiovascular fitness compared to team handball, swimming and badminton  
23 players, but not gymnastics. The difference in cardiovascular fitness might be due to differences in  
24 training intensity between the sports<sup>30</sup>. We know from previous studies that the intensity in football  
25 is high in terms of heart rate but we lack measurements for the other sports<sup>30</sup>. Another reason for the  
26 difference in the distance run may be the design of the test, which is favorable to intermittent sports  
27 like football, as it was originally designed for intermittent sports, or the high training frequency  
28 among football players.  
29  
30  
31  
32  
33  
34  
35  
36  
37  
38  
39  
40

41 Boys active in sports clubs jumped further and had better balance than non-active boys.  
42 The jump length is well correlated with muscle strength and shows, together with the higher muscle  
43 percentage, a better muscular fitness for the ASA boys<sup>17</sup>. In relation to balance, it is an important  
44 parameter in many physical activities, and since competences in activities helps to keep motivation<sup>13</sup>,  
45 this might lead to enhanced physical activity.  
46  
47  
48  
49  
50

### 51 52 *Cardiovascular health profile*

53 Resting heart rate (RHR) was lower for boys active in all sports clubs, as well as in gymnasts, football  
54 and handball players compared to non-active boys. Previous studies have found comparable  
55 differences in RHR and an association between cardiovascular fitness profile and RHR<sup>10 16</sup>.  
56  
57  
58  
59  
60

1  
2  
3  
4  
5  
6  
7  
8  
9  
10  
11  
12  
13  
14  
15  
16  
17  
18  
19  
20  
21  
22  
23  
24  
25  
26  
27  
28  
29  
30  
31  
32  
33  
34  
35  
36  
37  
38  
39  
40  
41  
42  
43  
44  
45  
46  
47  
48  
49  
50  
51  
52  
53  
54  
55  
56  
57  
58  
59  
60

Blood pressure was normotensive for all groups, but diastolic blood pressure (DBP) was significantly lower for footballers than non-active boys were, while systolic pressure was higher in the football players. Both differences are very small (0.2 mmHG) and should be interpreted carefully. The clinical relevance of the difference in blood pressure can be discussed, but blood pressure paths are recognisable in childhood and a healthy blood pressure in childhood will follow into adulthood and avert development of hypertension<sup>31</sup>.

Previous cross-sectional studies have not shown any differences in blood pressure or MAP when comparing different sport groups with inactive school children<sup>10 16</sup>, so the findings in the present study are preferred to be confirmed by studies with similar sample size.

### *Body composition*

Boys participating in leisure-time sports had lower body mass, BMI and fat percentage and higher relative muscle percentage than non-active boys. These differences were also seen among girls<sup>7</sup> and as stated there “the differences might be explained by the higher level of PA that children enrolled in leisure time sport have, which is also higher than for children participating in self-organised sports and children who do not participate in sports at all”<sup>32 33</sup>. Gymnasts had the lowest body mass, BMI and fat percentage compared to the other sports, with a few exceptions. The differences could be caused by a gymnast’s exercises bearing own weight, where low weight is important. On the other hand, swimmers had higher fat and lower muscle percentage compared to boys active in football, badminton and gymnastics, which may be related to a poorer health status, or a selection bias, since that type of body composition might be an advantage in (long distance) swimming, and swimming training may not have a positive effect on body composition<sup>34</sup>.

### *Practical implications*

This article revealed that boys participating in leisure time sports club activities have better health profile, physical capacity and well-being. The results provide specific information regarding sports club activities in Danish boys as a whole as well as for five popular sporting activities, with football and gymnastics as prominent examples. The results suggest that higher levels of sport participation possibly increase fitness profiles and well-being and should be considered by parents, politician and sports organizations. They should ensure that children participate in leisure time sports and thereby could positively impact the health and well-being of future generations.

## CONCLUSIONS:

Boys participating in club-based leisure-time sports showed markedly higher levels of well-being and better fitness and health profiles than boys not involved in any sports club activities. Boys involved in football had better aerobic fitness and better body composition compared to those active in other sports. Therefore, leisure-time sports club activities seem to be both beneficial and important for childhood well-being, fitness and physical health profile, with a team sport like football as a prominent example.

## ACKNOWLEDGMENTS

The authors would like to give a special thanks to pupils, teachers and pedagogues at the participating schools for their contribution. Thanks to the many students and scientific staff who have been involved in the huge number of tests.

**Author Contributions:** MNL conducted testing, analysed the data, prepared the first draft of the paper, revised the manuscript, and approved the final version of the paper. A-ME contributed to the design of the study, revised the manuscript and approved the final submission. MM, EEM, RC, RRL and KR implemented the intervention, conducted testing, analysed the data, revised the manuscript and approved the final submission. SRC performed the statistical analysis. PK designed the study, applied for funding, implemented the intervention, analysed the data, prepared the first draft of the paper, revised the manuscript and approved the final version of the paper.

**Ethics approval:** The study was approved by the Regional Committees on Health Research Ethics for Copenhagen and Southern Denmark (J.no. H-16026885).

**Competing interests:** No competing interests.

**Funding:** The Nordea-Foundation (Nordea-fonden), the Danish Football Association (DBU) and Aase and Ejnar Danielsens Foundation.

**Data availability statement:** Data are available upon reasonable request. Deidentified participant data can be shared in respect of data protection and ethical approval. Please contact: 11forhealth@sdu.dk

**Provenance and peer review:** Not commissioned; externally peer reviewed.

## REFERENCES:

1. Andersen LB, Harro M, Sardinha LB, et al. Physical activity and clustered cardiovascular risk in children: a cross-sectional study (The European Youth Heart Study). *The Lancet* 2006;368(9532):299-304. doi: 10.1016/s0140-6736(06)69075-2
2. Bangsbo J, Krstrup P, Duda J, et al. The Copenhagen Consensus Conference 2016: children, youth and physical activity in schools and during leisure time. *Br J Sports Med* 2016;50(19):1177-78
3. Organization WH. Global status report on noncommunicable diseases 2014: World Health Organization 2014.
4. Buttitta M, Iliescu C, Rousseau A, et al. Quality of life in overweight and obese children and adolescents: a literature review. *Quality of life research* 2014;23(4):1117-39.
5. Zahner L, Muehlbauer T, Schmid M, et al. Association of sports club participation with fitness and fatness in children. *Med Sci Sports Exerc* 2009;41(2):344.
6. Ngamaba KH, Panagioti M, Armitage CJ. How strongly related are health status and subjective well-being? Systematic review and meta-analysis. *Euro J of Pub Health* 2017;27(5):879-85.
7. Madsen M. Team sports activity in school and in leisure-time sports clubs for 8–12-year-olds – Exercise intensity and importance for cardiovascular health, fitness, body composition and well-being [PhD]. University of Southern Denmark, 2020.
8. Nielsen G, Bugge A, Andersen LB. The influence of club football on children's daily physical activity. *Soccer & Society* 2015;17(2):246-58. doi: 10.1080/14660970.2015.1082754
9. Wold B, Duda JL, Balaguer I, et al. Comparing self-reported leisure-time physical activity, subjective health, and life satisfaction among youth soccer players and adolescents in a reference sample. *Int J Sport and Exerc Psych* 2013;11(4):328-40.
10. Ørntoft C, Larsen MN, Madsen M, et al. Physical Fitness and Body Composition in 10–12-Year-Old Danish Children in Relation to Leisure-Time Club-Based Sporting Activities. *BioMed Res Int* 2018;2018:1-8. doi: 10.1155/2018/9807569
11. Eime RM, Young JA, Harvey JT, et al. A systematic review of the psychological and social benefits of participation in sport for children and adolescents: informing development of a conceptual model of health through sport. *Int J Behav Nutr Phys Act* 2013;10(1):1-21.
12. Reinboth M, Duda JL. Perceived motivational climate, need satisfaction and indices of well-being in team sports: A longitudinal perspective. *Psych Sport and Exer* 2006;7(3):269-86.
13. Deci EL, Ryan RM. Self-determination theory: A macrotheory of human motivation, development, and health. *Can Psych* 2008;49(3):182.

14. Alvarez MS, Balaguer I, Castillo I, et al. The coach-created motivational climate, young athletes' well-being, and intentions to continue participation. *J Clin Sport Psych* 2012;6(2):166-79.
15. Ravens-Sieberer U, Herdman M, Devine J, et al. The European KIDSCREEN approach to measure quality of life and well-being in children: development, current application, and future advances. *Qual Life Res* 2014;23(3):791-803. doi: 10.1007/s11136-013-0428-3 [published Online First: 2013/05/18]
16. Larsen MN, Nielsen CM, Orntoft CO, et al. Physical Fitness and Body Composition in 8-10-Year-Old Danish Children Are Associated With Sports Club Participation. *J Strength Con Res.* 2017;31(12):3425-34. doi: 10.1519/jsc.0000000000001952
17. Castro-Pinero J, Ortega FB, Artero EG, et al. Assessing muscular strength in youth: usefulness of standing long jump as a general index of muscular fitness. *J Strength Con Res.* 2010;24(7):1810-7. doi: 10.1519/JSC.0b013e3181ddb03d
18. Ortega FB, Artero EG, Ruiz JR, et al. Reliability of health-related physical fitness tests in European adolescents. The HELENA Study. *Int J Obes (Lond)* 2008;32 Suppl 5:S49-57. doi: 10.1038/ijo.2008.183
19. Ahler T, Bendiksen M, Krustup P, et al. Aerobic fitness testing in 6- to 9-year-old children: reliability and validity of a modified Yo-Yo IR1 test and the Andersen test. *Eur. J. Appl. Physiol.* 2012;112(3):871-6. doi: 10.1007/s00421-011-2039-4
20. Povoas SCA, Castagna C, da Costa Soares JM, et al. Reliability and Construct Validity of Yo-Yo Tests in Untrained and Soccer-Trained Schoolgirls Aged 9-16. *Pediatr Exerc Sci* 2016;28(2):321-30. doi: 10.1123/pes.2015-0212
21. Panta K, Arulsingh W, Raj J, et al. A study to associate the Flamingo Test and the Stork Test in measuring static balance on healthy adults. *The Foot and Ankle Online Journal* 2015;8 doi: 10.3827/faoj.2015.0803.0004
22. Hammami R, Chaouachi A, Makhlof I, et al. Associations Between Balance and Muscle Strength, Power Performance in Male Youth Athletes of Different Maturity Status. *Pediatr Exerc Sci* 2016;28 doi: 10.1123/pes.2015-0231
23. Montgomery DC, Peck EA, Vining GG. Introduction to linear regression analysis: John Wiley & Sons 2012.
24. Larsen MN, Nielsen CM, Ørntoft C, et al. Physical fitness and body composition in 8–10-year-old Danish children are associated with sports club participation. *BioMed Res Int* 2017;31(12)
25. Wikman JM, Elsborg P, Ryom K. Psychological benefits of team sport. In: Parnell D, Krustup P, eds. *Sport and Health: Exploring the Current State of Play*, Routledge 2017.
26. Nielsen G, Bugge A, Andersen LB. The influence of club football on children's daily physical activity. *Soccer Soc.* 2015:1-13. doi: 10.1080/14660970.2015.1082754
27. Bangsbo J, Krustup P, Duda J, et al. The Copenhagen Consensus Conference 2016: children, youth, and physical activity in schools and during leisure time. *Br J Sports Med* 2016;50(19):1177-78.
28. Spengler S, Woll A. The more physically active, the healthier? The relationship between physical activity and health-related quality of life in adolescents: the MoMo study. *J Phys Act Health* 2013;10(5):708-15.
29. Mintjens S, Menting MD, Daams JG, et al. Cardiorespiratory Fitness in Childhood and Adolescence Affects Future Cardiovascular Risk Factors: A Systematic Review of Longitudinal Studies. *Sports Med* 2018;48(11):2577-605. doi: 10.1007/s40279-018-0974-5
30. Bendiksen M, Williams CA, Hornstrup T, et al. Heart rate response and fitness effects of various types of physical education for 8- to 9-year-old schoolchildren. *Eur J Sport Sci* 2014;14(8):861-9. doi: 10.1080/17461391.2014.884168

1  
2  
3  
4  
5  
6  
7  
8  
9  
10

31. Theodore RF, Broadbent J, Nagin D, et al. Childhood to Early-Midlife Systolic Blood Pressure Trajectories: Early-Life Predictors, Effect Modifiers, and Adult Cardiovascular Outcomes. *Hypertension (Dallas, Tex : 1979)* 2015;66(6):1108-15. doi: 10.1161/
32. Mooses K, Kull M. The participation in organised sport doubles the odds of meeting physical activity recommendations in 7–12-year-old children. *Eur J Sport Sci* 2019;1-7. doi:

|                      | Soccer    |      | Team Handball |      | Gymnastics |      | Swimming |      | Badminton |      | All sports (ASA) |      | No Sports (NSA) |      |
|----------------------|-----------|------|---------------|------|------------|------|----------|------|-----------|------|------------------|------|-----------------|------|
|                      | Mean      | SD   | Mean          | SD   | Mean       | SD   | Mean     | SD   | Mean      | SD   | Mean             | SD   | Mean            | SD   |
| Yo-Yo IR1 C test (m) | ahsb 1139 | 567  | af919         | 510  | absf897    | 514  | g756     | 457  | agf782    | 452  | a973             | 543  | 616             | 403  |
| Height (cm)          | hb 151.4  | 6.9  | afg153.1      | 6.1  | h149.8     | 5.8  | 152.0    | 7.1  | af152.0   | 7.1  | 151.5            | 6.9  | 151.1           | 7.4  |
| Weight (kg)          | ahs 41.3  | 7.6  | fg43.7        | 8.6  | abs40.8    | 7.7  | 43.7     | 9.7  | 41.85     | 9.84 | 41.89            | 8.5  | 43.79           | 9.6  |
| SLJ (cm)             | a 115.4   | 38.9 | a114.6        | 37.3 | as118.6    | 37.0 | a111.7   | 39.1 | a121.8    | 30.1 | a115.1           | 38.6 | 104.9           | 40.0 |
| Balance (s)          | a 4.38    | 3.38 | ab3.81        | 2.44 | 4.13       | 3.05 | b3.68    | 2.41 | as4.80    | 3.53 | a4.33            | 3.33 | 3.49            | 3.20 |
| Fat percentage (%)   | as 18.56  | 6.75 | a19.72        | 7.39 | as 19.02   | 6.65 | bfg21.62 | 8.45 | as19.49   | 7.57 | a19.41           | 7.38 | 23.22           | 8.55 |
| Muscle mass (%)      | as 43.20  | 4.02 | a42.86        | 3.95 | as42.83    | 3.80 | fg41.63  | 4.46 | a42.58    | 4.29 | a42.77           | 4.26 | 40.72           | 4.71 |

10.1080/17461391.2019.1645887

33. Lagestad P, Mikalsen H, Ingulfsvann LS, et al. Associations of Participation in Organized Sport and Self-Organized Physical Activity in Relation to Physical Activity Level Among Adolescents. *Front Public Health* 2019;7(129):129. doi: 10.3389/fpubh.2019.00129
34. Clarke DH, Vaccaro P. The effect of swimming training on muscular performance and body composition in children. *Res Q Am. Ass Health* 1979;50(1):9-17.

11  
12  
13  
14  
15  
16  
17  
18  
19  
20  
21  
22  
23  
24  
25  
26  
27  
28  
29  
30  
31  
32  
33  
34  
35  
36  
37  
38  
39  
40  
41  
42  
43  
44  
45  
46  
47  
48  
49  
50  
51  
52  
53  
54  
55  
56  
57  
58  
59  
60

#### TABLES AND FIGURES:

Table 1. Physical fitness profile and training frequency for all boys active in leisure-time sports, the five primary sports and the no-sport group.

1  
2  
3  
4  
5  
6  
7  
8  
9  
10  
11  
12  
13  
14  
15  
16  
17  
18  
19  
20  
21  
22  
23  
24  
25  
26  
27  
28  
29  
30  
31  
32  
33  
34  
35  
36  
37  
38  
39  
40  
41  
42  
43  
44  
45  
46  
47  
48  
49  
50  
51  
52  
53  
54  
55  
56  
57  
58  
59  
60

|                             |           |      |        |      |        |      |         |      |         |      |        |      |       |      |
|-----------------------------|-----------|------|--------|------|--------|------|---------|------|---------|------|--------|------|-------|------|
| SBP (mmHg)                  | a 101.4   | 8.6  | a100.9 | 9.7  | 100.3  | 9.2  | 101.7   | 9.1  | 100.8   | 9.7  | 101.0  | 8.8  | 101.2 | 9.2  |
| DBP (mmHg)                  | a 64.5    | 7.25 | a63.5  | 5.8  | 63.8   | 7.1  | 64.6    | 8.1  | 64.7    | 6.9  | 64.33  | 7.2  | 64.8  | 7.0  |
| MAP (mmHg)                  | 76.8      | 6.72 | 76.0   | 6.3  | 76.0   | 7.0  | 77.0    | 7.8  | 76.7    | 6.9  | 76.6   | 6.8  | 76.9  | 6.8  |
| RHR (bpm)                   | a 72.1    | 10.2 | a72.1  | 10.2 | a72.7  | 9.5  | 74.3    | 10.2 | 74.1    | 10.6 | a72.7  | 10.1 | 75.9  | 10.0 |
| BMI                         | ahs 17.91 | 2.48 | a18.58 | 3.03 | 18.10  | 2.65 | bf18.79 | 3.42 | as17.91 | 2.85 | a18.16 | 2.86 | 19.05 | 3.25 |
| VO <sub>2</sub> (mL/min/kg) | ahsb 55.5 | 6.6  | a53.0  | 5.9  | as52.7 | 6.0  | f51.1   | 5.3  | af51.4  | 5.3  | a53.6  | 6.3  | 49.4  | 4.7  |
| Training/wk (n)             | 2.5       | 0.8  | 2.3    | 0.7  | 1.5    | 0.8  | 1.8     | 1.1  | 1.9     | 0.9  | 2.2    | 0.9  | 0     | 0    |

Raw means ± SD. NSA, non-sports-club active; ASA, all-sports-club active; a = sign. different from “No-sport”. f = sign. different from Soccer. h = sign. different from Team handball. g = sign. different from Gymnastics. s = sign. different from Swimming. d = sign. different from Dance. P≤0.05.

**Table 2. KIDSCREEN-27 well-being score for all boys active in leisure-time sports. the five primary sports and the no-sport group.**

| Well-being measurements         |                 |                  |              |               |             |              |           |
|---------------------------------|-----------------|------------------|--------------|---------------|-------------|--------------|-----------|
|                                 | No Sports (NSA) | All sports (ASA) | Soccer       | Team handball | Gymnastics  | Swimming     | Badminton |
| <b>Physical well-being</b>      |                 |                  |              |               |             |              |           |
| Mean                            | 45.9± 8.7       | 51.7 ± 9.7a      | 53.3 ± 9.6as | 51.7±10.6as   | 51.1±7.7a   | 48.7±10.2afg | 50.7±8.6a |
| <b>Psychological well-being</b> |                 |                  |              |               |             |              |           |
| Mean                            | 51.4±10.0       | 53.3± 9.6a       | 51.4 ± 9.2ah | 52.4±10.1f    | 53.1± 9.4fd | 52.3±9.3     | 52.8±9.6  |
| <b>Peers and social support</b> |                 |                  |              |               |             |              |           |

|                           |           |           |             |           |           |           |            |
|---------------------------|-----------|-----------|-------------|-----------|-----------|-----------|------------|
| <b>Mean</b>               | 48.0±11.6 | 50.9±9.9a | 51.8± 9.8ah | 49.6±9.6  | 49.6±8.5  | 50.0±9.7  | 50.6±10.4a |
| <b>School environment</b> |           |           |             |           |           |           |            |
| <b>Mean</b>               | 45.9±8.1  | 48.6±7.5a | 48.8±7.2a   | 47.8±8.1a | 48.0±7.5a | 48.2±7.0a | 49.0±7.8a  |

Raw means  $\pm$  SD. NSA. non-sports-club active; ASA. all-sports-club active; a = sign. different from "No-sport". f = sign. different from Soccer. h = sign. different from Team handball. g = sign. different from Gymnastics. s = sign. different from Swimming. d = sign. different from Dance.  $P \leq 0.05$ .

Figure 1: Participants flow chart.



# Reporting checklist for cross sectional study.

Based on the STROBE cross sectional guidelines.

## Instructions to authors

Complete this checklist by entering the page numbers from your manuscript where readers will find each of the items listed below.

Your article may not currently address all the items on the checklist. Please modify your text to include the missing information. If you are certain that an item does not apply, please write "n/a" and provide a short explanation.

Upload your completed checklist as an extra file when you submit to a journal.

In your methods section, say that you used the STROBE cross sectional reporting guidelines, and cite them as:

von Elm E, Altman DG, Egger M, Pocock SJ, Gøtzsche PC, Vandenbroucke JP. The Strengthening the Reporting of Observational Studies in Epidemiology (STROBE) Statement: guidelines for reporting observational studies.

|                           |                     | Reporting Item                                                                                  | Page Number |
|---------------------------|---------------------|-------------------------------------------------------------------------------------------------|-------------|
| <b>Title and abstract</b> |                     |                                                                                                 |             |
| Title                     | <a href="#">#1a</a> | Indicate the study's design with a commonly used term in the title or the abstract              | 1           |
| Abstract                  | <a href="#">#1b</a> | Provide in the abstract an informative and balanced summary of what was done and what was found | 2           |
| <b>Introduction</b>       |                     |                                                                                                 |             |
| Background / rationale    | <a href="#">#2</a>  | Explain the scientific background and rationale for the investigation being reported            | 3           |
| Objectives                | <a href="#">#3</a>  | State specific objectives, including any prespecified hypotheses                                | 4           |
| <b>Methods</b>            |                     |                                                                                                 |             |
| Study design              | <a href="#">#4</a>  | Present key elements of study design early in the paper                                         | 4           |
| Setting                   | <a href="#">#5</a>  | Describe the setting, locations, and relevant dates, including periods of                       | 5           |

recruitment, exposure, follow-up, and data collection

|    |                      |                      |                                                                              |
|----|----------------------|----------------------|------------------------------------------------------------------------------|
| 1  |                      |                      |                                                                              |
| 2  |                      |                      |                                                                              |
| 3  | Eligibility criteria | <a href="#">#6a</a>  | Give the eligibility criteria, and the sources and methods of selection of 5 |
| 4  |                      |                      | participants.                                                                |
| 5  |                      |                      |                                                                              |
| 6  |                      | <a href="#">#7</a>   | Clearly define all outcomes, exposures, predictors, potential 5              |
| 7  |                      |                      | confounders, and effect modifiers. Give diagnostic criteria, if applicable   |
| 8  |                      |                      |                                                                              |
| 9  |                      |                      |                                                                              |
| 10 | Data sources /       | <a href="#">#8</a>   | For each variable of interest give sources of data and details of methods 5  |
| 11 | measurement          |                      | of assessment (measurement). Describe comparability of assessment            |
| 12 |                      |                      | methods if there is more than one group. Give information separately         |
| 13 |                      |                      | for for exposed and unexposed groups if applicable.                          |
| 14 |                      |                      |                                                                              |
| 15 |                      |                      |                                                                              |
| 16 |                      |                      |                                                                              |
| 17 | Bias                 | <a href="#">#9</a>   | Describe any efforts to address potential sources of bias 8                  |
| 18 |                      |                      |                                                                              |
| 19 | Study size           | <a href="#">#10</a>  | Explain how the study size was arrived at 4                                  |
| 20 |                      |                      |                                                                              |
| 21 | Quantitative         | <a href="#">#11</a>  | Explain how quantitative variables were handled in the analyses. If 8        |
| 22 | variables            |                      | applicable, describe which groupings were chosen, and why                    |
| 23 |                      |                      |                                                                              |
| 24 |                      |                      |                                                                              |
| 25 | Statistical          | <a href="#">#12a</a> | Describe all statistical methods, including those used to control for 8      |
| 26 | methods              |                      | confounding                                                                  |
| 27 |                      |                      |                                                                              |
| 28 |                      |                      |                                                                              |
| 29 | Statistical          | <a href="#">#12b</a> | Describe any methods used to examine subgroups and interactions 8            |
| 30 | methods              |                      |                                                                              |
| 31 |                      |                      |                                                                              |
| 32 |                      |                      |                                                                              |
| 33 | Statistical          | <a href="#">#12c</a> | Explain how missing data were addressed 8                                    |
| 34 | methods              |                      |                                                                              |
| 35 |                      |                      |                                                                              |
| 36 |                      |                      |                                                                              |
| 37 | Statistical          | <a href="#">#12d</a> | If applicable, describe analytical methods taking account of sampling 8      |
| 38 | methods              |                      | strategy                                                                     |
| 39 |                      |                      |                                                                              |
| 40 |                      |                      |                                                                              |
| 41 | Statistical          | <a href="#">#12e</a> | Describe any sensitivity analyses 8                                          |
| 42 | methods              |                      |                                                                              |
| 43 |                      |                      |                                                                              |
| 44 |                      |                      |                                                                              |
| 45 | <b>Results</b>       |                      |                                                                              |
| 46 |                      |                      |                                                                              |
| 47 | Participants         | <a href="#">#13a</a> | Report numbers of individuals at each stage of study—eg numbers 5            |
| 48 |                      |                      | potentially eligible, examined for eligibility, confirmed eligible,          |
| 49 |                      |                      | included in the study, completing follow-up, and analysed. Give              |
| 50 |                      |                      | information separately for for exposed and unexposed groups if               |
| 51 |                      |                      | applicable.                                                                  |
| 52 |                      |                      |                                                                              |
| 53 |                      |                      |                                                                              |
| 54 |                      |                      |                                                                              |
| 55 | Participants         | <a href="#">#13b</a> | Give reasons for non-participation at each stage 5                           |
| 56 |                      |                      |                                                                              |
| 57 | Participants         | <a href="#">#13c</a> | Consider use of a flow diagram 5                                             |
| 58 |                      |                      |                                                                              |
| 59 |                      |                      |                                                                              |
| 60 |                      |                      |                                                                              |

|    |                    |                      |                                                                                                                                                                                                                   |     |
|----|--------------------|----------------------|-------------------------------------------------------------------------------------------------------------------------------------------------------------------------------------------------------------------|-----|
| 1  | Descriptive data   | <a href="#">#14a</a> | Give characteristics of study participants (eg demographic, clinical, social) and information on exposures and potential confounders. Give information separately for exposed and unexposed groups if applicable. | 8   |
| 2  |                    |                      |                                                                                                                                                                                                                   |     |
| 3  |                    |                      |                                                                                                                                                                                                                   |     |
| 4  |                    |                      |                                                                                                                                                                                                                   |     |
| 5  |                    |                      |                                                                                                                                                                                                                   |     |
| 6  | Descriptive data   | <a href="#">#14b</a> | Indicate number of participants with missing data for each variable of interest                                                                                                                                   | 5   |
| 7  |                    |                      |                                                                                                                                                                                                                   |     |
| 8  |                    |                      |                                                                                                                                                                                                                   |     |
| 9  |                    |                      |                                                                                                                                                                                                                   |     |
| 10 | Outcome data       | <a href="#">#15</a>  | Report numbers of outcome events or summary measures. Give information separately for exposed and unexposed groups if applicable.                                                                                 | 8   |
| 11 |                    |                      |                                                                                                                                                                                                                   |     |
| 12 |                    |                      |                                                                                                                                                                                                                   |     |
| 13 |                    |                      |                                                                                                                                                                                                                   |     |
| 14 | Main results       | <a href="#">#16a</a> | Give unadjusted estimates and, if applicable, confounder-adjusted estimates and their precision (eg, 95% confidence interval). Make clear which confounders were adjusted for and why they were included          | 8   |
| 15 |                    |                      |                                                                                                                                                                                                                   |     |
| 16 |                    |                      |                                                                                                                                                                                                                   |     |
| 17 |                    |                      |                                                                                                                                                                                                                   |     |
| 18 |                    |                      |                                                                                                                                                                                                                   |     |
| 19 | Main results       | <a href="#">#16b</a> | Report category boundaries when continuous variables were categorized                                                                                                                                             | 8   |
| 20 |                    |                      |                                                                                                                                                                                                                   |     |
| 21 | Main results       | <a href="#">#16c</a> | If relevant, consider translating estimates of relative risk into absolute risk for a meaningful time period                                                                                                      | N/A |
| 22 |                    |                      |                                                                                                                                                                                                                   |     |
| 23 |                    |                      |                                                                                                                                                                                                                   |     |
| 24 |                    |                      |                                                                                                                                                                                                                   |     |
| 25 | Other analyses     | <a href="#">#17</a>  | Report other analyses done—e.g., analyses of subgroups and interactions, and sensitivity analyses                                                                                                                 | 8   |
| 26 |                    |                      |                                                                                                                                                                                                                   |     |
| 27 |                    |                      |                                                                                                                                                                                                                   |     |
| 28 |                    |                      |                                                                                                                                                                                                                   |     |
| 29 | <b>Discussion</b>  |                      |                                                                                                                                                                                                                   |     |
| 30 |                    |                      |                                                                                                                                                                                                                   |     |
| 31 | Key results        | <a href="#">#18</a>  | Summarise key results with reference to study objectives                                                                                                                                                          | 9   |
| 32 |                    |                      |                                                                                                                                                                                                                   |     |
| 33 |                    |                      |                                                                                                                                                                                                                   |     |
| 34 | Limitations        | <a href="#">#19</a>  | Discuss limitations of the study, taking into account sources of potential bias or imprecision. Discuss both direction and magnitude of any potential bias.                                                       | 11  |
| 35 |                    |                      |                                                                                                                                                                                                                   |     |
| 36 |                    |                      |                                                                                                                                                                                                                   |     |
| 37 |                    |                      |                                                                                                                                                                                                                   |     |
| 38 |                    |                      |                                                                                                                                                                                                                   |     |
| 39 | Interpretation     | <a href="#">#20</a>  | Give a cautious overall interpretation considering objectives, limitations, multiplicity of analyses, results from similar studies, and other relevant evidence.                                                  | 11  |
| 40 |                    |                      |                                                                                                                                                                                                                   |     |
| 41 |                    |                      |                                                                                                                                                                                                                   |     |
| 42 |                    |                      |                                                                                                                                                                                                                   |     |
| 43 |                    |                      |                                                                                                                                                                                                                   |     |
| 44 | Generalisability   | <a href="#">#21</a>  | Discuss the generalisability (external validity) of the study results                                                                                                                                             | 12  |
| 45 |                    |                      |                                                                                                                                                                                                                   |     |
| 46 |                    |                      |                                                                                                                                                                                                                   |     |
| 47 | <b>Other</b>       |                      |                                                                                                                                                                                                                   |     |
| 48 | <b>Information</b> |                      |                                                                                                                                                                                                                   |     |
| 49 |                    |                      |                                                                                                                                                                                                                   |     |
| 50 |                    |                      |                                                                                                                                                                                                                   |     |
| 51 | Funding            | <a href="#">#22</a>  | Give the source of funding and the role of the funders for the present study and, if applicable, for the original study on which the present article is based                                                     | 13  |
| 52 |                    |                      |                                                                                                                                                                                                                   |     |
| 53 |                    |                      |                                                                                                                                                                                                                   |     |
| 54 |                    |                      |                                                                                                                                                                                                                   |     |
| 55 |                    |                      |                                                                                                                                                                                                                   |     |

56 The STROBE checklist is distributed under the terms of the Creative Commons Attribution License CC-BY.

57 This checklist was completed on 12. February 2021 using <https://www.goodreports.org/>, a tool made by the

58 [EQUATOR Network](#) in collaboration with [Penelope.ai](#)

59 For peer review only - <http://bmjopen.bmj.com/site/about/guidelines.xhtml>

# BMJ Open

## Well-being, physical fitness and health profile of 10-12-year-old boys in relation to leisure-time sports club activities – a cross sectional study.

|                                 |                                                                                                                                                                                                                                                                                                                                                                                                                                                                                                                                                                                                                                                                                                                                                                                                                                                                                                                                                                                                                                                                                                                                                                                                                                                                                                                    |
|---------------------------------|--------------------------------------------------------------------------------------------------------------------------------------------------------------------------------------------------------------------------------------------------------------------------------------------------------------------------------------------------------------------------------------------------------------------------------------------------------------------------------------------------------------------------------------------------------------------------------------------------------------------------------------------------------------------------------------------------------------------------------------------------------------------------------------------------------------------------------------------------------------------------------------------------------------------------------------------------------------------------------------------------------------------------------------------------------------------------------------------------------------------------------------------------------------------------------------------------------------------------------------------------------------------------------------------------------------------|
| Journal:                        | <i>BMJ Open</i>                                                                                                                                                                                                                                                                                                                                                                                                                                                                                                                                                                                                                                                                                                                                                                                                                                                                                                                                                                                                                                                                                                                                                                                                                                                                                                    |
| Manuscript ID                   | bmjopen-2021-050194.R1                                                                                                                                                                                                                                                                                                                                                                                                                                                                                                                                                                                                                                                                                                                                                                                                                                                                                                                                                                                                                                                                                                                                                                                                                                                                                             |
| Article Type:                   | Original research                                                                                                                                                                                                                                                                                                                                                                                                                                                                                                                                                                                                                                                                                                                                                                                                                                                                                                                                                                                                                                                                                                                                                                                                                                                                                                  |
| Date Submitted by the Author:   | 08-Sep-2021                                                                                                                                                                                                                                                                                                                                                                                                                                                                                                                                                                                                                                                                                                                                                                                                                                                                                                                                                                                                                                                                                                                                                                                                                                                                                                        |
| Complete List of Authors:       | Larsen, Malte ; University of Southern Denmark, Department of Sports Science and Clinical Biomechanics, Sport and Health Sciences Cluster<br>Madsen, Mads; University of Southern Denmark, Department of Sports Science and Clinical Biomechanics, Sport and Health Sciences Cluster<br>Cyril, Rasmus; University of Southern Denmark, Department of Sports Science and Clinical Biomechanics, Sport and Health Sciences Cluster<br>Madsen, Esben; University of Southern Denmark, Department of Sports Science and Clinical Biomechanics, Sport and Health Sciences Cluster;<br>University College Copenhagen, Institut for Terapeut- og Jordemoderuddannelser<br>Lind, Rune R.; University of Southern Denmark, Department of Sports Science and Clinical Biomechanics, Sport and Health Sciences Cluster<br>Ryom, Knud; Aarhus University Faculty of Health Sciences<br>Christiansen, Søren; Aarhus University, Department of Public Health<br>Elbe, Anne-Marie; Leipzig University Faculty of Sport Science, 5Institute of Sport Psychology and Physical Education<br>Krustrup, Peter; University of Southern Denmark, Department of Sports Science and Clinical Biomechanics; University of Exeter School of Sport and Health Sciences, Sport and Health Sciences, College of Life and Environmental Sciences |
| <b>Primary Subject Heading</b>: | Public health                                                                                                                                                                                                                                                                                                                                                                                                                                                                                                                                                                                                                                                                                                                                                                                                                                                                                                                                                                                                                                                                                                                                                                                                                                                                                                      |
| Secondary Subject Heading:      | General practice / Family practice, Global health, Mental health, Paediatrics                                                                                                                                                                                                                                                                                                                                                                                                                                                                                                                                                                                                                                                                                                                                                                                                                                                                                                                                                                                                                                                                                                                                                                                                                                      |
| Keywords:                       | PUBLIC HEALTH, EDUCATION & TRAINING (see Medical Education & Training), MENTAL HEALTH                                                                                                                                                                                                                                                                                                                                                                                                                                                                                                                                                                                                                                                                                                                                                                                                                                                                                                                                                                                                                                                                                                                                                                                                                              |
|                                 |                                                                                                                                                                                                                                                                                                                                                                                                                                                                                                                                                                                                                                                                                                                                                                                                                                                                                                                                                                                                                                                                                                                                                                                                                                                                                                                    |

SCHOLARONE™  
Manuscripts



I, the Submitting Author has the right to grant and does grant on behalf of all authors of the Work (as defined in the below author licence), an exclusive licence and/or a non-exclusive licence for contributions from authors who are: i) UK Crown employees; ii) where BMJ has agreed a CC-BY licence shall apply, and/or iii) in accordance with the terms applicable for US Federal Government officers or employees acting as part of their official duties; on a worldwide, perpetual, irrevocable, royalty-free basis to BMJ Publishing Group Ltd ("BMJ") its licensees and where the relevant Journal is co-owned by BMJ to the co-owners of the Journal, to publish the Work in this journal and any other BMJ products and to exploit all rights, as set out in our [licence](#).

The Submitting Author accepts and understands that any supply made under these terms is made by BMJ to the Submitting Author unless you are acting as an employee on behalf of your employer or a postgraduate student of an affiliated institution which is paying any applicable article publishing charge ("APC") for Open Access articles. Where the Submitting Author wishes to make the Work available on an Open Access basis (and intends to pay the relevant APC), the terms of reuse of such Open Access shall be governed by a Creative Commons licence – details of these licences and which [Creative Commons](#) licence will apply to this Work are set out in our licence referred to above.

Other than as permitted in any relevant BMJ Author's Self Archiving Policies, I confirm this Work has not been accepted for publication elsewhere, is not being considered for publication elsewhere and does not duplicate material already published. I confirm all authors consent to publication of this Work and authorise the granting of this licence.

1  
2  
3  
4 **Well-being, physical fitness and health profile of 10–12-year-old boys in relation**  
5 **to leisure-time sports club activities – a cross-sectional study**  
6  
7  
8  
9

10 Malte N. Larsen<sup>1</sup>, Mads Madsen<sup>1</sup>, Rasmus Cyril<sup>1</sup>, Esben Elholm Madsen<sup>1,2</sup>, Rune R. Lind<sup>1,3</sup>, Knud  
11 Ryom<sup>4</sup>, Søren Riis Christiansen<sup>4</sup>, Anne-Marie Elbe<sup>5</sup> and Peter Krstrup<sup>1,6</sup>  
12  
13

14  
15 *<sup>1</sup>Department of Sports Science and Clinical Biomechanics, Sport and Health Sciences Cluster*  
16 *(SHSC), University of Southern Denmark, Odense, Denmark; <sup>2</sup>Department of Physiotherapy and*  
17 *Occupational Therapy, University College Copenhagen, Copenhagen, Denmark; <sup>3</sup>Danish League*  
18 *Association (Divisionsforeningen), Brøndby, Denmark; <sup>4</sup>Department of Public Health, Aarhus*  
19 *University, Aarhus, Denmark; <sup>5</sup>Institute of Sport Psychology and Physical Education, Faculty of*  
20 *Sport Science, Leipzig University, Leipzig, Germany; <sup>6</sup>Danish Institute for Advanced Study (DIAS),*  
21 *University of Southern Denmark, Odense, Denmark.*  
22  
23  
24  
25  
26  
27  
28  
29  
30

31 Short title: Well-being and health profile in boys active in sports clubs  
32  
33

34 Key words: physical activity, football, team handball, gymnastics, swimming  
35  
36

37 Corresponding author:  
38  
39

40 Malte Nejst Larsen  
41 Department of Sports Science and Clinical Biomechanics  
42 University of Southern Denmark  
43 Campusvej 55, 5230 Odense M, Denmark  
44 Email: mnlarsen@health.sdu.dk  
45 Phone: + 45 40304689  
46  
47  
48  
49  
50  
51  
52  
53  
54  
55  
56  
57  
58  
59  
60

## ABSTRACT:

**OBJECTIVES:** This study investigated the correlation between sports club activities and well-being and physical health parameters in 10–12-yr-old boys. **DESIGN:** Cross-sectional. **SETTING:** Danish schools. **PARTICIPANTS:** 2,293 boys took part in the study. **PRIMARY AND SECONDARY OUTCOME MEASURES:** Questionnaires on participation in sports clubs and well-being and testing of physical health profile through measurement of body composition, resting heart rate (RHR), blood pressure and postural balance, jump and Yo-Yo IR1C performance. Data were analysed by participation in sport and according to the five most frequently reported sports. **RESULTS:** Boys enrolled in sports clubs had higher physical well-being ( $51.7\pm 9.7$  vs  $45.9\pm 8.7$ ) and psychological well-being ( $53.3\pm 9.6$  vs  $51.4\pm 10.0$ ), experienced more peer and social support ( $50.9\pm 9.9$  vs  $48.0\pm 11.6$ ), and had a more positive perception of the school environment ( $48.6\pm 7.5$  vs  $45.9\pm 8.1$ ) than boys not involved in sports clubs. In addition, they showed better Yo-Yo IR1C (+46%), long-jump (9%) and balance test performance (+20%). The boys active in sports clubs had higher relative muscle mass (+6%) and lower fat percentage (-3%), BMI (-6%) and RHR (-5%) compared to boys not involved in sports clubs ( $p<0.05$ ). Boys enrolled in football clubs had higher aerobic fitness compared to boys not active in clubs (+11%), handball players (+5%), swimmers (+8%) and badminton players (+7%). Moreover, the boys enrolled in football clubs had lower fat percentage (-17%) and higher relative muscle mass (+4%) than swimmers. **CONCLUSION:** Boys participating in club-based sports showed markedly higher levels of well-being and better physical health profiles than boys not involved in sports club activities. Footballers had superior aerobic fitness and body composition compared to those active in other sports. Results suggest that sports club activities seem to be beneficial for young boys' well-being, fitness and physical health profile, with the greatest benefits achieved by boys involved in football.

## ARTICLE SUMMARY

### *Strengths and limitations*

- A strength is the large number of participants, making it possible to evaluate the differences in well-being and physical health profile from the five most popular sporting activities among boys, whereas earlier studies have lacked statistical power to detect differences when dividing the sample into more than three groups.

- Even though the participant numbers in the various sporting groups differ, the groups are all large, with a minimum of 79 participants.
- Most areas of the country are represented, with schools from both larger and smaller cities as well as the countryside.
- The cross-sectional design is not able to detect causal relations but gives a snapshot of the results. Furthermore, we did not collect data on the boys' everyday activities, such as active transport, or other social or physical activities, which have a bearing on the daily level of activity and might therefore affect both well-being and physical health.
- Neither do we have any data on how long the boys have participated in sports club activities. More years in a sports club are probably more beneficial to well-being and physical health.

## BACKGROUND:

Physical activity (PA) is strongly associated with physiological and mental health benefits for children and adolescents<sup>1,2</sup>, and sports clubs are important arenas for children to be physically active.

Participating in a leisure-time sport increases PA in general, but also increases PA in settings outside the particular leisure-time sport. A study by Nielsen et al.<sup>3</sup> compared the daily activity level of children participating in different leisure-time sports activities and children with no leisure-time sports club participation. They found that children who played football in a sports club (even those who trained only once a week) had a higher daily level of moderate and vigorous PA, and that half of the difference could be explained by higher activity levels during school time<sup>3</sup>. Children active in leisure-time sports other than football also showed increased PA levels during school breaks and spare time, but only when the children had at least two training sessions per week outside of school. Higher overall PA during school time, however, was not recorded among children for sports other than football.

The literature shows that being overweight in childhood and adolescence is associated with reduced quality of life, especially with regard to physical and psychological well-being, social support and school-related well-being<sup>4,5</sup>. The risk of reduced quality of life due to poor well-being is comparable to that of diseases such as diabetes and other chronic conditions<sup>6</sup>, so it is of great relevance to prevent overweight, e.g. by being active in sports<sup>7</sup>, as well as looking at other aspects of physical health status

1  
2  
3  
4 and well-being given that health status is strongly related to quality of life<sup>8</sup>. Club participation in  
5 popular sports is associated with physical and mental health in Danish 10–12-year-old girls<sup>9</sup>.  
6  
7 However, comparable studies focusing on boys and their most popular sports are lacking. It is  
8 therefore of great relevance to investigate whether well-being is associated with sports participation  
9 among 10–12-year-old boys. The age group is of interest, since physical activity in general decreases  
10 during the pre-teen period and health status is related to the risk of various lifestyle diseases in  
11 adulthood<sup>2</sup>.  
12  
13  
14  
15  
16  
17  
18  
19

20 There are a few studies investigating the association between sports participation and health profile in  
21 boys. A cross-sectional study by Wold et al.<sup>10</sup> compared a population of football players with an age-  
22 representative reference population. The results of the study show that the football population in  
23 general shows better self-assessed health. This is also found in a pilot study of the present study,  
24 which shows that boys participating in sports in general, and football in particular, have a better  
25 overall health profile compared to boys not active in sports clubs<sup>11</sup>.  
26  
27  
28  
29  
30  
31

32 One way in which sports participation can impact on well-being is via the motivational climate that  
33 is created by the coach, often seen in team sports<sup>12 13</sup>. If a motivational sporting climate satisfies  
34 players' basic psychological needs for autonomy, competence and social relatedness, as outlined in  
35 Deci and Ryan's Self Determination Theory<sup>14</sup> (SDT), then well-being can be ensured. A study by  
36 Alvarez et al., for example, showed how football training which emphasised the process rather than  
37 the result could positively impact players' psychological well-being and motivation<sup>15</sup>. A process-  
38 oriented environment focuses on individual effort and development rather than on the result. It also  
39 places importance on community and cooperation between participants<sup>15</sup>, and thereby satisfies  
40 participants' basic psychological needs.  
41  
42  
43  
44  
45  
46  
47  
48

49 The aim of the present study is to investigate the association between participation in leisure-time  
50 sports club activities and well-being and physical health parameters in 10–12-year-old Danish boys.  
51  
52  
53

## 54 METHODS:

55  
56  
57  
58  
59  
60

1  
2  
3  
4 We investigated the association between various leisure-time sporting activities and broad-spectrum  
5 physiological health, performance and well-being parameters in 10–12-year-old boys by conducting  
6 a cross-sectional study using a multicomponent testing battery. The testing included measurements  
7 of cardiovascular fitness, body composition and functional capacity, and questionnaires including  
8 biographical information, leisure-time sports activity and well-being. The testers were blinded to  
9 whether or not the boys were active in a sports club. The tests were performed in early autumn  
10 (August/September) or early spring (February, March or April). The present study was conducted  
11 from August 2016 to September 2018 as an integrated part of the nationwide “11 for Health in  
12 Denmark” project, with a specific focus on the baseline results of all participating boys. The study  
13 was conducted in collaboration with the Danish Football Association (FA), which issued invitations,  
14 by email and phone, to all Danish schools to participate in “11 for Health”. The pupils in the  
15 participating schools were invited to take part in the scientific measurements in the project and the  
16 parents received detailed written and oral information about the study, any possible hazards or  
17 discomforts, and the option to withdraw at any time. Written informed parental consent was obtained  
18 for all participants. The study was approved by the Regional Committees on Health Research Ethics  
19 for Copenhagen and Southern Denmark (J.no H-16026885).

### 32 33 *Patient and public involvement*

34 As an integrated part of the nationwide “11 for Health in Denmark” project, the public was involved  
35 in the development of the testing protocol through a sparring group led by the Danish FA. All results  
36 will be distributed by email to the participating schools and disseminated through seminars for the  
37 relevant professionals and press releases targeting the relevant section of the public, e.g. the parents.  
38  
39  
40  
41  
42  
43

### 44 *Sample*

45 Boys from the 157 participating schools, geographically spread all over Denmark, were included in  
46 the study if they had written consent from their parents and filled out the questionnaire regarding  
47 sports participation. 2,293 subjects took part in the study, of which 1,854 boys were active in sports  
48 clubs and pooled into the all-sports active group (ASA), while 439 were not active in sports clubs and  
49 were pooled into the non-sports active group (NSA), see figure 1 for the study flow chart. The ASA  
50 boys were on average active  $2.2 \pm 0.9$  times a week, with the following weekly attendance for each of  
51 the individual sports: football (n=897)  $2.5 \pm 0.8$  times per week; team handball (n=131)  $2.3 \pm 0.7$  times  
52 per week; gymnastics (n=85)  $1.6 \pm 0.8$  per week; swimming (n=121)  $1.8 \pm 1.1$  per week; and badminton  
53  
54  
55  
56  
57  
58  
59  
60

(n=126) 1.4±0.7 per week. All data were collected at the participating schools during regular class hours.

Insert Figure 1: Participants' flow chart.

### *Questionnaires on leisure-time sports activity and quality of life*

The participants' well-being was evaluated using a shortened version of the Danish KIDSCREEN-27 questionnaire<sup>16</sup>. KIDSCREEN-27 has 27 items within five dimensions: "physical wellbeing" (5 items); "psychological well-being" (7 items); "autonomy and parent relations"; (7 items); "peers and social support" (4 items); and "school environment" (4 items). The "autonomy and parent relations" scale was not considered relevant to the aim of the present investigation and therefore left out to minimise the number of items. The items are rated on a five-point Likert scale ranging from "never" to "always" or "not at all" to "extremely". Higher KIDSCREEN-27 scores designate better well-being. The KIDSCREEN-27 questionnaire has shown very good reliability (Cronbach's alphas: 0.80–0.84) and high test-retest reliability<sup>16</sup>.

Leisure-time sports activity, age and gender were identified in the questionnaires. The participants were asked whether they were enrolled in any leisure-time sport (yes/no). If yes, they were asked to say which sports they were involved in and the number of weekly training sessions. If they were active in more than one leisure-time sport, they were instructed to state the sport they did most often. This part of the questionnaire was a self-developed section but based on a comparable questionnaire that has been used in previous studies in similar age groups<sup>11 17</sup>.

### *Resting blood pressure and heart rate (HR)*

In a supine position, three blood pressure measurements were taken at approximately 1-minute intervals after 8 minutes of initial rest. The measurements were taken in a quiet room on the left upper arm using an automatic blood pressure monitor (M6 HEM-7223-E, Omron, Illinois, USA) with adjusted cuff size. If the first three systolic or diastolic blood pressure measurements varied by more than 10 mmHg, an additional measurement was taken. Resting HR was measured at the same time using the automatic blood pressure monitor.

### *Body composition*

1  
2  
3  
4 Body mass, muscle mass (kg) and body fat (%) were measured using an InBody 270 multifrequency  
5 body composition analyzer (Biospace, California, USA). The subjects were weighed barefoot and in  
6 light clothing. The validity and reliability of the InBody 270 compared to DXA scanning in 127 10–  
7 12-yr old girls and boys have shown interclass correlation of 0.99 for fat percentage and 0.97 for  
8 muscle mass<sup>9</sup>. Height was measured with 0.1 cm precision using a Tanita Leicester portable altimeter  
9 (Tanita, Amsterdam, Netherlands).  
10  
11  
12  
13  
14

### 15 16 *Muscle strength*

17  
18 Standing long jump performance was measured following a reduced version of the FIFA 11+ warm-  
19 up programme, including jumps, as described by Ørntoft et al.<sup>11</sup> The participants performed two  
20 jumps separated by a 5–10-minute rest. The jumps were performed wearing sports shoes or barefoot.  
21 The participants stood still with their feet parallel and shoulder-width apart, their toes just behind a  
22 line. The children were instructed to bend their knees to a 90-degree squat position with their hands  
23 placed on their hips and to hold this position for 2 seconds before jumping as far as possible, still with  
24 their hands on their hips. The distance from the start line to the back heel was measured in centimetres.  
25 Each child had two tries 5–10 minutes apart: the longest jump was reported as the result. The standing  
26 long jump is a valid test for children aged 6–17 years, is strongly associated with upper- ( $r=0.82$ –  
27 0.86) and lower-body ( $r=0.69$ –0.85) maximal muscle strength, and shows moderate to high reliability  
28  
29  
30  
31  
32  
33  
34  
35  
36  
37  
38  
39  
40  
41  
42  
43  
44  
45  
46  
47  
48  
49  
50  
51  
52  
53  
54  
55  
56  
57  
58  
59  
60

### *Cardiovascular fitness*

Running performance was evaluated by YYIR1C. The test was performed indoors in a gymnasium.  
The test consisted of two 16-metre shuttle runs at progressively increasing speeds, separated by 10  
seconds of jogging after each session of running around a cone placed 4 metres behind the start line.  
Each run was separated by a beep from an audio device played through loudspeakers. The frequency  
of the beeps increased throughout the test. The first time the participant failed to make the finish line  
in time, a warning was given; the second time, the test ended for the participant. Total running  
distance was recorded. Before the real test, the children were familiarised with the protocol for the  
test procedure by running the three initial shuttles (also used as a re-warm-up session before the test).  
Aerobic fitness was estimated from the running distance in the YYIR1C test by the equation:  $VO_{2max}$   
 $= 0.0116x+42.3$  ml/min/kg, as described by Ahler et al.<sup>20</sup>. The test has been validated in 6–11-year-

1  
2  
3  
4 old children (CV for 9–11-year-old girls: untrained girls CV=10.1%, football-playing girls  
5 CV=11.5%)<sup>20 21</sup>.

### 6 7 8 9 *Balance test*

10  
11 Postural balance was evaluated using the stork balance stand test<sup>22</sup>. The children stood barefoot and  
12 positioned their hands on their hips, then placed their non-supporting foot on the inside knee of the  
13 supporting leg. They then raised their heel to balance on the forefoot.  
14

15  
16 The time started as the heel was raised from the floor. The timer was stopped if: a) the  
17 hands left the hips; b) the supporting foot rotated or moved in any direction; c) the non-supporting  
18 foot lost contact with the knee; d) the heel of the supporting foot touched the floor. The stork balance  
19 test has a high test-retest reliability in a fit adolescent population and is valid for evaluating postural  
20 balance in young adults<sup>22 23</sup>.  
21  
22  
23  
24  
25

26  
27 The physiological measurements described above were always performed in the same order,  
28 beginning with resting blood pressure, resting HR and InBody measurements, followed by a uniform  
29 warm-up, a standing long jump test and the YYIR1C. The testing was conducted by trained test  
30 personnel from the university blinded to the children's sports club participation. They were assisted  
31 by qualified teachers and/or pedagogues.  
32  
33  
34  
35  
36

### 37 *Statistical analysis*

38  
39 Cronbach's alpha scores calculated with SPSS Statistic 25 (IBM SPSS Statistics, Chicago, IL, USA)  
40 were used to determine the internal consistency of the four well-being scales. Mean and SD were  
41 calculated for all test results, age and weekly frequency of participation in sports. Multiple linear  
42 regression, in which age was adjusted for, was used to analyse differences between boys active in  
43 sports clubs and boys not active in sport clubs. The same statistical analysis was used to investigate  
44 differences between the five most popular sports, and here adjusted for both age and frequency of  
45 weekly participation<sup>24</sup>.  
46  
47  
48  
49  
50  
51  
52

53 Data were analysed according to whether the boys participated in leisure-time sport and according to  
54 the five most frequently reported sports.  
55  
56  
57  
58  
59  
60

1  
2  
3  
4 RESULTS: Boys enrolled in leisure-time sports clubs had higher physical well-being ( $51.7\pm 9.7$  vs  
5  $45.9\pm 8.7$ ) and psychological well-being ( $53.3\pm 9.6$  vs  $51.4\pm 10.0$ ), experienced more peer and social  
6 support ( $50.9\pm 9.9$  vs  $48.0\pm 11.6$ ), and had a more positive perception of the school environment  
7 ( $48.6\pm 7.5$  vs  $45.9\pm 8.1$ ). The boys active in sports clubs also had better Yo-Yo IR1C (+46%), long  
8 jump (9%) and balance test performance (+20%) than boys not involved in leisure-time sports clubs.  
9 The boys active in leisure-time sports clubs had higher relative muscle mass (+6%) and lower fat  
10 percentage (-3%), BMI (-6%) and RHR (-5%) compared to boys not involved in leisure-time sport  
11 ( $p<0.05$ ). Boys enrolled in football clubs had higher aerobic fitness compared to boys not active in  
12 leisure-time sports clubs (+11%), handball players (+5%), swimmers (+8%) and badminton players  
13 (+7%). Moreover, the boys enrolled in football clubs had lower fat percentage (-17%) and higher  
14 relative muscle mass (+4%) than swimmers. All results can be found in Tables 1 and 2.  
15  
16  
17  
18  
19  
20  
21  
22  
23  
24

25 INSERT TABLE 1 AND 2  
26  
27  
28  
29  
30  
31  
32  
33  
34  
35  
36  
37  
38  
39  
40  
41  
42  
43  
44  
45  
46  
47  
48  
49  
50  
51  
52  
53  
54  
55  
56  
57  
58  
59  
60

## DISCUSSION

The main finding in the present study was that boys participating in club-based leisure-time sports showed markedly higher levels of well-being and fitness, and better health profiles than boys not involved in any sports club activities. These findings are in line with previous findings from the “11 for Health in Europe” pilot study, as well as findings among younger boys in Denmark<sup>11 25</sup>. Boys involved in football had better aerobic fitness and better body composition compared to those active in other sports, which was also seen previously<sup>11</sup>. Although this cross-sectional study does not describe any causal effects of sports participation, it is interesting that those participating in football have a superior health and performance profile, as well as better well-being scores related to social support and positive school environment, compared to other sports with similar training frequency. Since the study is cross-sectional, we cannot conclude what causes the differences, but the following section will suggest some possible explanations based on the assumptions that there could be different intensity and quality<sup>26</sup> during training in the clubs and that participation in different sports can lead to different behaviour, including around the training sessions<sup>3</sup>.

### *Well-being*

The boys who engaged in leisure-time sports club activity had better physical and psychological well-being and reported higher peer and social support and a more positive school environment compared to the boys who were not active in leisure-time sporting activities. The better well-being for the active boys might be caused by a greater amount of MVPA, social activities connected to sports club participation, higher self-perception and self-worth, as well as positive perception of the school environment and due to more and better social relations/connections (social capital), as discussed in a recent paper from the same study found the exact same differences in girls<sup>9</sup>.

For boys playing football, the relationship with peers and social support was superior when compared to the non-sports group, which also confirms findings in girls. The benefits of team vs individual sports have been studied with different outcomes, but overall the psychological outcomes of team sports seem to be more advantageous compared to individual sports<sup>27</sup>. The feeling of a more positive school environment might be caused by the experiences that skilled players have in physical education classes, but especially also in school breaks, when football and other sports are often played. This also leads to more physical activity during school time for football players<sup>28</sup>. And, in addition, boys can experience satisfaction of the basic needs for autonomy, competence and social relatedness, which could explain the higher well-being scores<sup>14</sup>.

1  
2  
3  
4 In general, the findings support the general assumption that participation in leisure-time  
5 sports clubs is associated with higher well-being scores in children<sup>29 30</sup>.  
6  
7  
8

### 9 *Performance measurements*

10 Performance in YYIR1C is highly correlated with maximal oxygen uptake measured in the laboratory  
11 setting<sup>20</sup>. As cardiovascular fitness in children and adolescents affects risk factors for future BMI,  
12 body fat and metabolic syndrome, good cardiovascular fitness is important for future health<sup>31</sup>. Boys  
13 doing leisure-time sport ran 58% further in the YYIR1C test, corresponding to 4.1 ml/kg/min, than  
14 NSA boys, while boys playing football ran 85, 24, 51 and 64% further, corresponding to 6.1, 2.6, 4.4  
15 and 4.1 ml/kg/min respectively, compared to NSA subjects, handball players, swimmers and  
16 badminton players. That boys participating in leisure-time sports have greater cardiovascular fitness  
17 than non-active boys were also found in previous small-scale studies in 8–12-year-old boys<sup>11 17</sup>.  
18 Furthermore, the analysis of the five sports in this study reveals that boys playing football had higher  
19 cardiovascular fitness compared to team handball players, swimmers and badminton players, but not  
20 gymnasts. The difference in cardiovascular fitness might be due to differences between the sports in  
21 training intensity<sup>26</sup>. We know from previous studies that the intensity in football is high in terms of  
22 heart rate, but we lack measurements for the other sports<sup>26</sup>. Another reason for the difference in the  
23 distance run may be the design of the test, which is favourable to intermittent sports such as football,  
24 as it was originally designed for intermittent sports, or the high training frequency among football  
25 players.  
26  
27  
28  
29  
30  
31  
32  
33  
34  
35  
36  
37  
38

39 Boys active in sports clubs jumped further and had better balance than non-active boys.  
40 The jump length is well correlated with muscle strength and shows, together with the higher muscle  
41 percentage, a better muscular fitness for the ASA boys<sup>18</sup>. In relation to balance, it is an important  
42 parameter in many physical activities, and since competence in activities helps with maintaining  
43 motivation<sup>14</sup>, this might lead to enhanced physical activity.  
44  
45  
46  
47  
48

### 49 *Cardiovascular health profile*

50 Resting heart rate (RHR) was lower for boys active in all sports clubs, as well as in gymnasts,  
51 footballers and handball players compared to non-active boys. Previous studies have found  
52 comparable differences in RHR and an association between cardiovascular fitness profile and RHR<sup>11</sup>  
53  
54  
55  
56  
57  
58  
59  
60

1  
2  
3  
4 Blood pressure was normotensive for all groups, but diastolic blood pressure (DBP) was  
5 significantly lower for footballers than for non-active boys, while systolic blood pressure was higher  
6 in the football players. Both differences are very small (0.2 mmHG) and should be interpreted  
7 carefully. The clinical relevance of the difference in blood pressure can be discussed, but blood  
8 pressure paths are detectable in childhood and a healthy blood pressure in childhood will follow into  
9 adulthood and avert development of hypertension<sup>32</sup>.

10  
11 Previous cross-sectional studies have not shown any differences in blood pressure or  
12 MAP when comparing different sporting groups with inactive school children<sup>11 17</sup>, so the findings of  
13 the present study should ideally be confirmed by studies with similar sample size.  
14

### 15 16 17 18 19 20 21 *Body composition*

22 Boys participating in leisure-time sports had lower body mass, BMI and fat percentage, and higher  
23 relative muscle percentage, than non-active boys. These differences were also seen in girls<sup>9</sup> and, as  
24 stated there, “the differences might be explained by the higher level of PA that children enrolled in  
25 leisure-time sport have, which is also higher than for children participating in self-organised sports  
26 and children who do not participate in sports at all”<sup>33 34</sup>. Gymnasts had the lowest body mass, BMI  
27 and fat percentage compared to the other sports, with a few exceptions. The differences could be  
28 caused by a gymnast’s exercises bearing own weight, where low weight is important. On the other  
29 hand, swimmers had higher fat and lower muscle percentage compared to boys active in football,  
30 badminton and gymnastics, which may be related to a poorer health status, or to a selection bias, since  
31 that type of body composition might be an advantage in (long-distance) swimming and swimming  
32 training may not have a positive effect on body composition<sup>35</sup>.  
33  
34  
35  
36  
37  
38  
39  
40  
41  
42  
43

### 44 *Practical implications*

45 This study revealed that boys participating in leisure-time sports club activities have better health  
46 profile, physical capacity and well-being. The results provide specific information regarding sports  
47 club activities in Danish boys as a whole, as well as for five popular sporting activities, with football  
48 and gymnastics as prominent examples. The results suggest that higher levels of participation in sport  
49 possibly improve fitness profiles and well-being and should be considered by parents, politicians and  
50 sports organisations. They should ensure that children participate in leisure-time sports, thereby  
51 potentially having a positive impact on the health and well-being of future generations. This could be  
52  
53  
54  
55  
56  
57  
58  
59  
60

1  
2  
3  
4 done by introducing sports in schools and by helping challenged families with financing and  
5 guidance.  
6  
7  
8  
9  
10

## 11 CONCLUSIONS:

12 Boys participating in club-based leisure-time sports showed markedly higher levels of well-being,  
13 and better fitness and health profiles, than boys not involved in any sports club activities. Boys  
14 involved in football had better aerobic fitness and better body composition compared to those active  
15 in other sports. Therefore, leisure-time sports club activities seem to be both beneficial and important  
16 for childhood well-being, fitness and physical health profile, with a team sport like football as a  
17 prominent example.  
18  
19  
20  
21  
22  
23  
24

## 25 ACKNOWLEDGMENTS

26 The authors would like to give special thanks to the pupils, teachers and pedagogues at the  
27 participating schools for their contribution. Thanks to the many students and scientific staff who have  
28 been involved in the huge number of tests.  
29  
30  
31  
32  
33

34 **Author contributions:** MNL conducted testing, analysed the data, prepared the first draft of the  
35 paper, revised the manuscript and approved the final version of the paper. A-ME contributed to the  
36 design of the study, revised the manuscript and approved the final submission. MM, EEM, RC, RRL  
37 and KR implemented the intervention, conducted testing, analysed the data, revised the manuscript  
38 and approved the final submission. SRC performed the statistical analysis. PK designed the study,  
39 applied for funding, implemented the intervention, analysed the data, prepared the first draft of the  
40 paper, revised the manuscript and approved the final version of the paper.  
41  
42  
43  
44  
45  
46  
47

48 **Ethics approval:** The study was approved by the Regional Committees on Health Research Ethics  
49 for Copenhagen and Southern Denmark (J.no. H-16026885).  
50  
51  
52

53 **Competing interests:** No competing interests.  
54  
55

56 **Funding:** The Nordea Foundation (95-154-71338), the Danish Football Association (95-154-71361)  
57 and Aase and Ejnar Danielsens Foundation (95-154-71318).  
58  
59  
60

1  
2  
3  
4  
5  
6  
7  
8  
9  
10  
11  
12  
13  
14  
15  
16  
17  
18  
19  
20  
21  
22  
23  
24  
25  
26  
27  
28  
29  
30  
31  
32  
33  
34  
35  
36  
37  
38  
39  
40  
41  
42  
43  
44  
45  
46  
47  
48  
49  
50  
51  
52  
53  
54  
55  
56  
57  
58  
59  
60

**Data availability statement:** Data are available upon reasonable request. Deidentified participant data can be shared in respect of data protection and ethical approval. Please contact [11forhealth@sdu.dk](mailto:11forhealth@sdu.dk).

**Provenance and peer review:** Not commissioned; externally peer reviewed.

#### REFERENCES:

1. Andersen LB, Harro M, Sardinha LB, et al. Physical activity and clustered cardiovascular risk in children: a cross-sectional study (The European Youth Heart Study). *The Lancet* 2006;368(9532):299-304. doi: 10.1016/s0140-6736(06)69075-2
2. Bangsbo J, Krstrup P, Duda J, et al. The Copenhagen Consensus Conference 2016: children, youth and physical activity in schools and during leisure time. *Br J Sports Med* 2016;50(19):1177-78
3. Nielsen G, Bugge A, Andersen LB. The influence of club football on children's daily physical activity. *Soccer & Society* 2015;17(2):246-58. doi: 10.1080/14660970.2015.1082754
4. Wallander J, Kerbawy S, Toomey S, et al. Is obesity associated with reduced health-related quality of life in Latino, black and white children in the community? *International Journal of Obesity* 2013;37(7):920-25.
5. Meixner L, Cohrdes C, Schienkiewitz A, et al. Health-related quality of life in children and adolescents with overweight and obesity: results from the German KIGGS survey. *BMC public health* 2020;20(1):1-11.
6. Buttitta M, Iliescu C, Rousseau A, et al. Quality of life in overweight and obese children and adolescents: a literature review. *Quality of life research* 2014;23(4):1117-39.
7. Zahner L, Muehlbauer T, Schmid M, et al. Association of sports club participation with fitness and fatness in children. *Medicine+ Science in Sports+ Exercise* 2009;41(2):344.
8. Ngamaba KH, Panagioti M, Armitage CJ. How strongly related are health status and subjective well-being? Systematic review and meta-analysis. *The European Journal of Public Health* 2017;27(5):879-85.
9. Madsen M. Team sports activity in school and in leisure-time sports clubs for 8–12-year-olds – Exercise intensity and importance for cardiovascular health, fitness, body composition and well-being [PhD]. University of Southern Denmark, 2020.
10. Wold B, Duda JL, Balaguer I, et al. Comparing self-reported leisure-time physical activity, subjective health, and life satisfaction among youth soccer players and adolescents in a reference sample. *International Journal of Sport and Exercise Psychology* 2013;11(4):328-40.
11. Ørntoft C, Larsen MN, Madsen M, et al. Physical Fitness and Body Composition in 10–12-Year-Old Danish Children in Relation to Leisure-Time Club-Based Sporting Activities. *BioMed Research International* 2018;2018:1-8. doi: 10.1155/2018/9807569
12. Eime RM, Young JA, Harvey JT, et al. A systematic review of the psychological and social benefits of participation in sport for children and adolescents: informing development of a conceptual model of health through sport. *International journal of behavioral nutrition and physical activity* 2013;10(1):1-21.

13. Reinboth M, Duda JL. Perceived motivational climate, need satisfaction and indices of well-being in team sports: A longitudinal perspective. *Psychology of sport and exercise* 2006;7(3):269-86.
14. Deci EL, Ryan RM. Self-determination theory: A macrotheory of human motivation, development, and health. *Canadian psychology/Psychologie canadienne* 2008;49(3):182.
15. Alvarez MS, Balaguer I, Castillo I, et al. The coach-created motivational climate, young athletes' well-being, and intentions to continue participation. *Journal of clinical sport psychology* 2012;6(2):166-79.
16. Ravens-Sieberer U, Herdman M, Devine J, et al. The European KIDSCREEN approach to measure quality of life and well-being in children: development, current application, and future advances. *Qual Life Res* 2014;23(3):791-803. doi: 10.1007/s11136-013-0428-3 [published Online First: 2013/05/18]
17. Larsen MN, Nielsen CM, Orntoft CO, et al. Physical Fitness and Body Composition in 8-10-Year-Old Danish Children Are Associated With Sports Club Participation. *Journal of strength and conditioning research* 2017;31(12):3425-34. doi: 10.1519/jsc.0000000000001952 [published Online First: 2017/04/27]
18. Castro-Pinero J, Ortega FB, Artero EG, et al. Assessing muscular strength in youth: usefulness of standing long jump as a general index of muscular fitness. *Journal of strength and conditioning research* 2010;24(7):1810-7. doi: 10.1519/JSC.0b013e3181ddb03d [published Online First: 2010/06/18]
19. Ortega FB, Artero EG, Ruiz JR, et al. Reliability of health-related physical fitness tests in European adolescents. The HELENA Study. *Int J Obes (Lond)* 2008;32 Suppl 5:S49-57. doi: 10.1038/ijo.2008.183 [published Online First: 2008/11/26]
20. Ahler T, Bendiksen M, Krstrup P, et al. Aerobic fitness testing in 6- to 9-year-old children: reliability and validity of a modified Yo-Yo IR1 test and the Andersen test. *European journal of applied physiology* 2012;112(3):871-6. doi: 10.1007/s00421-011-2039-4 [published Online First: 2011/06/21]
21. Povoas SCA, Castagna C, da Costa Soares JM, et al. Reliability and Construct Validity of Yo-Yo Tests in Untrained and Soccer-Trained Schoolgirls Aged 9-16. *Pediatr Exerc Sci* 2016;28(2):321-30. doi: 10.1123/pes.2015-0212 [published Online First: 2015/12/24]
22. Panta K, Arulsingh W, Raj J, et al. A study to associate the Flamingo Test and the Stork Test in measuring static balance on healthy adults. *The Foot and Ankle Online Journal* 2015;8 doi: 10.3827/faoj.2015.0803.0004
23. Hammami R, Chaouachi A, Makhlof I, et al. Associations Between Balance and Muscle Strength, Power Performance in Male Youth Athletes of Different Maturity Status. *Pediatric exercise science* 2016;28 doi: 10.1123/pes.2015-0231
24. Montgomery DC, Peck EA, Vining GG. Introduction to linear regression analysis: John Wiley & Sons 2012.
25. Larsen MN, Nielsen CM, Orntoft C, et al. Physical fitness and body composition in 8–10-year-old Danish children are associated with sports club participation. *BioMed Research International* 2017;31(12)
26. Bendiksen M, Williams CA, Hornstrup T, et al. Heart rate response and fitness effects of various types of physical education for 8- to 9-year-old schoolchildren. *European journal of sport science* 2014;14(8):861-9. doi: 10.1080/17461391.2014.884168 [published Online First: 2014/02/19]
27. Wikman JM, Elsborg P, Ryom K. Psychological benefits of team sport. In: Parnell D, Krstrup P, eds. Sport and Health: Exploring the Current State of Play 2017.

1  
2  
3  
4  
5  
6  
7  
8  
9  
10  
11  
12  
13  
14  
15  
16  
17  
18  
19  
20  
21  
22  
23  
24  
25  
26  
27  
28  
29  
30  
31  
32  
33  
34  
35  
36  
37  
38  
39  
40  
41  
42  
43  
44  
45  
46  
47  
48  
49  
50  
51  
52  
53  
54  
55  
56  
57  
58  
59  
60

28. Nielsen G, Bugge A, Andersen LB. The influence of club football on children's daily physical activity. *Soccer & Society* 2015;1-13. doi: 10.1080/14660970.2015.1082754
29. Bangsbo J, Krstrup P, Duda J, et al. The Copenhagen Consensus Conference 2016: children, youth, and physical activity in schools and during leisure time. *British Journal of Sports Medicine* 2016;50(19):1177-78.
30. Spengler S, Woll A. The more physically active, the healthier? The relationship between physical activity and health-related quality of life in adolescents: the MoMo study. *Journal of Physical Activity and Health* 2013;10(5):708-15.
31. Mintjens S, Menting MD, Daams JG, et al. Cardiorespiratory Fitness in Childhood and Adolescence Affects Future Cardiovascular Risk Factors: A Systematic Review of Longitudinal Studies. *Sports Med* 2018;48(11):2577-605. doi: 10.1007/s40279-018-0974-5 [published Online First: 2018/08/26]
32. Theodore RF, Broadbent J, Nagin D, et al. Childhood to Early-Midlife Systolic Blood Pressure Trajectories: Early-Life Predictors, Effect Modifiers, and Adult Cardiovascular Outcomes. *Hypertension (Dallas, Tex : 1979)* 2015;66(6):1108-15. doi: 10.1161/HYPERTENSIONAHA.115.05831 [published Online First: 2015/11/13]
33. Mooses K, Kull M. The participation in organised sport doubles the odds of meeting physical activity recommendations in 7–12-year-old children. *European journal of sport science* 2019;1-7. doi: 10.1080/17461391.2019.1645887
34. Lagestad P, Mikalsen H, Ingulfsvann LS, et al. Associations of Participation in Organized Sport and Self-Organized Physical Activity in Relation to Physical Activity Level Among Adolescents. *Front Public Health* 2019;7(129):129. doi: 10.3389/fpubh.2019.00129 [published Online First: 2019/06/11]
35. Clarke DH, Vaccaro P. The effect of swimming training on muscular performance and body composition in children. *Research Quarterly American Alliance for Health, Physical Education, Recreation and Dance* 1979;50(1):9-17.

TABLES:

Table 1. Physical fitness profile and training frequency for all boys active in leisure-time sports. The five primary sports and the no-sports group.

|                           | Football  |      | Team Handball |      | Gymnastics |      | Swimming |      | Badminton |      | All Sports (ASA) |      | No Sports (NSA) |      |
|---------------------------|-----------|------|---------------|------|------------|------|----------|------|-----------|------|------------------|------|-----------------|------|
|                           | Mean      | SD   | Mean          | SD   | Mean       | SD   | Mean     | SD   | Mean      | SD   | Mean             | SD   | Mean            | SD   |
| Yo-Yo IR1 C test (m)      | ahsb 1139 | 567  | af919         | 510  | absf897    | 514  | g756     | 457  | agf782    | 452  | a973             | 543  | 616             | 403  |
| Height (cm)               | hb 151.4  | 6.9  | afg153.1      | 6.1  | h149.8     | 5.8  | 152.0    | 7.1  | af152.0   | 7.1  | 151.5            | 6.9  | 151.1           | 7.4  |
| Weight (kg)               | ahs 41.3  | 7.6  | fg43.7        | 8.6  | abs40.8    | 7.7  | 43.7     | 9.7  | 41.85     | 9.84 | 41.89            | 8.5  | 43.79           | 9.6  |
| SLJ (cm)                  | a 115.4   | 38.9 | a114.6        | 37.3 | as118.6    | 37.0 | a111.7   | 39.1 | a121.8    | 30.1 | a115.1           | 38.6 | 104.9           | 40.0 |
| Balance (s)               | a 4.38    | 3.38 | ab3.81        | 2.44 | 4.13       | 3.05 | b3.68    | 2.41 | as4.80    | 3.53 | a4.33            | 3.33 | 3.49            | 3.20 |
| Fat percentage (%)        | as 18.56  | 6.75 | a19.72        | 7.39 | as 19.02   | 6.65 | bgf21.62 | 8.45 | as19.49   | 7.57 | a19.41           | 7.38 | 23.22           | 8.55 |
| Muscle mass (%)           | as 43.20  | 4.02 | a42.86        | 3.95 | as42.83    | 3.80 | fg41.63  | 4.46 | a42.58    | 4.29 | a42.77           | 4.26 | 40.72           | 4.71 |
| SBP (mmHg)                | a 101.4   | 8.6  | a100.9        | 9.7  | 100.3      | 9.2  | 101.7    | 9.1  | 100.8     | 9.7  | 101.0            | 8.8  | 101.2           | 9.2  |
| DBP (mmHg)                | a 64.5    | 7.25 | a63.5         | 5.8  | 63.8       | 7.1  | 64.6     | 8.1  | 64.7      | 6.9  | 64.33            | 7.2  | 64.8            | 7.0  |
| MAP (mmHg)                | 76.8      | 6.72 | 76.0          | 6.3  | 76.0       | 7.0  | 77.0     | 7.8  | 76.7      | 6.9  | 76.6             | 6.8  | 76.9            | 6.8  |
| HR (bpm)                  | a 72.1    | 10.2 | a72.1         | 10.2 | a72.7      | 9.5  | 74.3     | 10.2 | 74.1      | 10.6 | a72.7            | 10.1 | 75.9            | 10.0 |
| BMI                       | ahs 17.91 | 2.48 | a18.58        | 3.03 | 18.10      | 2.65 | bf18.79  | 3.42 | as17.91   | 2.85 | a18.16           | 2.86 | 19.05           | 3.25 |
| VO <sub>2</sub> mL/min/kg | ahsb 55.5 | 6.6  | a53.0         | 5.9  | as52.7     | 6.0  | f51.1    | 5.3  | af51.4    | 5.3  | a53.6            | 6.3  | 49.4            | 4.7  |
| Training/wk (n)           | 2.5       | 0.8  | 2.3           | 0.7  | 1.5        | 0.8  | 1.8      | 1.1  | 1.9       | 0.9  | 2.2              | 0.9  | 0               | 0    |

Raw means ± SD. NSA = non-sports-club active; ASA = all-sports-club active; a = sign. difference from “no-sports”. f = sign. difference from football. h = sign. difference from team handball. g = sign. difference from gymnastics. s = sign. difference from swimming. d = sign. difference from badminton. P≤0.05.

Table 2. KIDSCREEN-27 well-being score for all boys active in leisure-time sports. The five primary sports and the no-sports group.

| Well-being measurements         |                 |                  |              |               |             |              |            |
|---------------------------------|-----------------|------------------|--------------|---------------|-------------|--------------|------------|
|                                 | No Sports (NSA) | All Sports (ASA) | Football     | Team Handball | Gymnastics  | Swimming     | Badminton  |
| <b>Physical well-being</b>      |                 |                  |              |               |             |              |            |
| Mean                            | 45.9± 8.7       | 51.7 ± 9.7a      | 53.3 ± 9.6as | 51.7±10.6as   | 51.1±7.7a   | 48.7±10.2afg | 50.7±8.6a  |
| <b>Psychological well-being</b> |                 |                  |              |               |             |              |            |
| Mean                            | 51.4±10.0       | 53.3± 9.6a       | 51.4 ± 9.2ah | 52.4±10.1f    | 53.1± 9.4fd | 52.3±9.3     | 52.8±9.6   |
| <b>Peers and social support</b> |                 |                  |              |               |             |              |            |
| Mean                            | 48.0±11.6       | 50.9±9.9a        | 51.8± 9.8ah  | 49.6±9.6      | 49.6±8.5    | 50.0±9.7     | 50.6±10.4a |
| <b>School environment</b>       |                 |                  |              |               |             |              |            |
| Mean                            | 45.9±8.1        | 48.6±7.5a        | 48.8±7.2a    | 47.8±8.1a     | 48.0±7.5a   | 48.2±7.0a    | 49.0±7.8a  |

Raw means ± SD. NSA = non-sports-club active; ASA = all-sports-club active; a = sign. difference from “no-sports”. f = sign. difference from football. h = sign. difference from team handball. g = sign. difference from gymnastics. s = sign. difference from swimming. d = sign. different from badminton.  $P \leq 0.05$ .

Figure 1: Participants' flow chart.



# Reporting checklist for cross sectional study.

Based on the STROBE cross sectional guidelines.

## Instructions to authors

Complete this checklist by entering the page numbers from your manuscript where readers will find each of the items listed below.

Your article may not currently address all the items on the checklist. Please modify your text to include the missing information. If you are certain that an item does not apply, please write "n/a" and provide a short explanation.

Upload your completed checklist as an extra file when you submit to a journal.

In your methods section, say that you used the STROBE cross sectional reporting guidelines, and cite them as:

von Elm E, Altman DG, Egger M, Pocock SJ, Gøtzsche PC, Vandenbroucke JP. The Strengthening the Reporting of Observational Studies in Epidemiology (STROBE) Statement: guidelines for reporting observational studies.

|                           |                     |                                                                                                 | Page<br>Number |
|---------------------------|---------------------|-------------------------------------------------------------------------------------------------|----------------|
| <b>Title and abstract</b> |                     |                                                                                                 |                |
| Title                     | <a href="#">#1a</a> | Indicate the study's design with a commonly used term in the title or the abstract              | 1              |
| Abstract                  | <a href="#">#1b</a> | Provide in the abstract an informative and balanced summary of what was done and what was found | 2              |
| <b>Introduction</b>       |                     |                                                                                                 |                |
| Background / rationale    | <a href="#">#2</a>  | Explain the scientific background and rationale for the investigation being reported            | 3              |
| Objectives                | <a href="#">#3</a>  | State specific objectives, including any prespecified hypotheses                                | 4              |
| <b>Methods</b>            |                     |                                                                                                 |                |
| Study design              | <a href="#">#4</a>  | Present key elements of study design early in the paper                                         | 4              |
| Setting                   | <a href="#">#5</a>  | Describe the setting, locations, and relevant dates, including periods of                       | 5              |

|    |                      |                                                                                                |   |
|----|----------------------|------------------------------------------------------------------------------------------------|---|
|    |                      | recruitment, exposure, follow-up, and data collection                                          |   |
| 1  |                      |                                                                                                |   |
| 2  | Eligibility criteria | <a href="#">#6a</a> Give the eligibility criteria, and the sources and methods of selection of | 5 |
| 3  |                      | participants.                                                                                  |   |
| 4  |                      |                                                                                                |   |
| 5  |                      |                                                                                                |   |
| 6  |                      | <a href="#">#7</a> Clearly define all outcomes, exposures, predictors, potential               | 5 |
| 7  |                      | confounders, and effect modifiers. Give diagnostic criteria, if applicable                     |   |
| 8  |                      |                                                                                                |   |
| 9  |                      |                                                                                                |   |
| 10 | Data sources /       | <a href="#">#8</a> For each variable of interest give sources of data and details of methods   | 5 |
| 11 | measurement          | of assessment (measurement). Describe comparability of assessment                              |   |
| 12 |                      | methods if there is more than one group. Give information separately                           |   |
| 13 |                      | for for exposed and unexposed groups if applicable.                                            |   |
| 14 |                      |                                                                                                |   |
| 15 |                      |                                                                                                |   |
| 16 |                      |                                                                                                |   |
| 17 | Bias                 | <a href="#">#9</a> Describe any efforts to address potential sources of bias                   | 8 |
| 18 |                      |                                                                                                |   |
| 19 | Study size           | <a href="#">#10</a> Explain how the study size was arrived at                                  | 4 |
| 20 |                      |                                                                                                |   |
| 21 | Quantitative         | <a href="#">#11</a> Explain how quantitative variables were handled in the analyses. If        | 8 |
| 22 | variables            | applicable, describe which groupings were chosen, and why                                      |   |
| 23 |                      |                                                                                                |   |
| 24 |                      |                                                                                                |   |
| 25 | Statistical          | <a href="#">#12a</a> Describe all statistical methods, including those used to control for     | 8 |
| 26 | methods              | confounding                                                                                    |   |
| 27 |                      |                                                                                                |   |
| 28 |                      |                                                                                                |   |
| 29 | Statistical          | <a href="#">#12b</a> Describe any methods used to examine subgroups and interactions           | 8 |
| 30 | methods              |                                                                                                |   |
| 31 |                      |                                                                                                |   |
| 32 |                      |                                                                                                |   |
| 33 | Statistical          | <a href="#">#12c</a> Explain how missing data were addressed                                   | 8 |
| 34 | methods              |                                                                                                |   |
| 35 |                      |                                                                                                |   |
| 36 |                      |                                                                                                |   |
| 37 | Statistical          | <a href="#">#12d</a> If applicable, describe analytical methods taking account of sampling     | 8 |
| 38 | methods              | strategy                                                                                       |   |
| 39 |                      |                                                                                                |   |
| 40 |                      |                                                                                                |   |
| 41 | Statistical          | <a href="#">#12e</a> Describe any sensitivity analyses                                         | 8 |
| 42 | methods              |                                                                                                |   |
| 43 |                      |                                                                                                |   |
| 44 |                      |                                                                                                |   |
| 45 | <b>Results</b>       |                                                                                                |   |
| 46 |                      |                                                                                                |   |
| 47 | Participants         | <a href="#">#13a</a> Report numbers of individuals at each stage of study—eg numbers           | 5 |
| 48 |                      | potentially eligible, examined for eligibility, confirmed eligible,                            |   |
| 49 |                      | included in the study, completing follow-up, and analysed. Give                                |   |
| 50 |                      | information separately for for exposed and unexposed groups if                                 |   |
| 51 |                      | applicable.                                                                                    |   |
| 52 |                      |                                                                                                |   |
| 53 |                      |                                                                                                |   |
| 54 |                      |                                                                                                |   |
| 55 | Participants         | <a href="#">#13b</a> Give reasons for non-participation at each stage                          | 5 |
| 56 |                      |                                                                                                |   |
| 57 | Participants         | <a href="#">#13c</a> Consider use of a flow diagram                                            | 5 |
| 58 |                      |                                                                                                |   |
| 59 |                      |                                                                                                |   |
| 60 |                      |                                                                                                |   |

|    |                    |                      |                                                                                                                                                                                                                   |     |
|----|--------------------|----------------------|-------------------------------------------------------------------------------------------------------------------------------------------------------------------------------------------------------------------|-----|
| 1  | Descriptive data   | <a href="#">#14a</a> | Give characteristics of study participants (eg demographic, clinical, social) and information on exposures and potential confounders. Give information separately for exposed and unexposed groups if applicable. | 8   |
| 2  |                    |                      |                                                                                                                                                                                                                   |     |
| 3  |                    |                      |                                                                                                                                                                                                                   |     |
| 4  |                    |                      |                                                                                                                                                                                                                   |     |
| 5  |                    |                      |                                                                                                                                                                                                                   |     |
| 6  | Descriptive data   | <a href="#">#14b</a> | Indicate number of participants with missing data for each variable of interest                                                                                                                                   | 5   |
| 7  |                    |                      |                                                                                                                                                                                                                   |     |
| 8  |                    |                      |                                                                                                                                                                                                                   |     |
| 9  |                    |                      |                                                                                                                                                                                                                   |     |
| 10 | Outcome data       | <a href="#">#15</a>  | Report numbers of outcome events or summary measures. Give information separately for exposed and unexposed groups if applicable.                                                                                 | 8   |
| 11 |                    |                      |                                                                                                                                                                                                                   |     |
| 12 |                    |                      |                                                                                                                                                                                                                   |     |
| 13 |                    |                      |                                                                                                                                                                                                                   |     |
| 14 | Main results       | <a href="#">#16a</a> | Give unadjusted estimates and, if applicable, confounder-adjusted estimates and their precision (eg, 95% confidence interval). Make clear which confounders were adjusted for and why they were included          | 8   |
| 15 |                    |                      |                                                                                                                                                                                                                   |     |
| 16 |                    |                      |                                                                                                                                                                                                                   |     |
| 17 |                    |                      |                                                                                                                                                                                                                   |     |
| 18 |                    |                      |                                                                                                                                                                                                                   |     |
| 19 | Main results       | <a href="#">#16b</a> | Report category boundaries when continuous variables were categorized                                                                                                                                             | 8   |
| 20 |                    |                      |                                                                                                                                                                                                                   |     |
| 21 | Main results       | <a href="#">#16c</a> | If relevant, consider translating estimates of relative risk into absolute risk for a meaningful time period                                                                                                      | N/A |
| 22 |                    |                      |                                                                                                                                                                                                                   |     |
| 23 |                    |                      |                                                                                                                                                                                                                   |     |
| 24 |                    |                      |                                                                                                                                                                                                                   |     |
| 25 | Other analyses     | <a href="#">#17</a>  | Report other analyses done—e.g., analyses of subgroups and interactions, and sensitivity analyses                                                                                                                 | 8   |
| 26 |                    |                      |                                                                                                                                                                                                                   |     |
| 27 |                    |                      |                                                                                                                                                                                                                   |     |
| 28 |                    |                      |                                                                                                                                                                                                                   |     |
| 29 | <b>Discussion</b>  |                      |                                                                                                                                                                                                                   |     |
| 30 |                    |                      |                                                                                                                                                                                                                   |     |
| 31 | Key results        | <a href="#">#18</a>  | Summarise key results with reference to study objectives                                                                                                                                                          | 9   |
| 32 |                    |                      |                                                                                                                                                                                                                   |     |
| 33 |                    |                      |                                                                                                                                                                                                                   |     |
| 34 | Limitations        | <a href="#">#19</a>  | Discuss limitations of the study, taking into account sources of potential bias or imprecision. Discuss both direction and magnitude of any potential bias.                                                       | 11  |
| 35 |                    |                      |                                                                                                                                                                                                                   |     |
| 36 |                    |                      |                                                                                                                                                                                                                   |     |
| 37 |                    |                      |                                                                                                                                                                                                                   |     |
| 38 |                    |                      |                                                                                                                                                                                                                   |     |
| 39 | Interpretation     | <a href="#">#20</a>  | Give a cautious overall interpretation considering objectives, limitations, multiplicity of analyses, results from similar studies, and other relevant evidence.                                                  | 11  |
| 40 |                    |                      |                                                                                                                                                                                                                   |     |
| 41 |                    |                      |                                                                                                                                                                                                                   |     |
| 42 |                    |                      |                                                                                                                                                                                                                   |     |
| 43 |                    |                      |                                                                                                                                                                                                                   |     |
| 44 | Generalisability   | <a href="#">#21</a>  | Discuss the generalisability (external validity) of the study results                                                                                                                                             | 12  |
| 45 |                    |                      |                                                                                                                                                                                                                   |     |
| 46 |                    |                      |                                                                                                                                                                                                                   |     |
| 47 | <b>Other</b>       |                      |                                                                                                                                                                                                                   |     |
| 48 | <b>Information</b> |                      |                                                                                                                                                                                                                   |     |
| 49 |                    |                      |                                                                                                                                                                                                                   |     |
| 50 |                    |                      |                                                                                                                                                                                                                   |     |
| 51 | Funding            | <a href="#">#22</a>  | Give the source of funding and the role of the funders for the present study and, if applicable, for the original study on which the present article is based                                                     | 13  |
| 52 |                    |                      |                                                                                                                                                                                                                   |     |
| 53 |                    |                      |                                                                                                                                                                                                                   |     |
| 54 |                    |                      |                                                                                                                                                                                                                   |     |
| 55 |                    |                      |                                                                                                                                                                                                                   |     |

The STROBE checklist is distributed under the terms of the Creative Commons Attribution License CC-BY.

This checklist was completed on 12. February 2021 using <https://www.goodreports.org/>, a tool made by the

[EQUATOR Network](#) in collaboration with [Penelope.ai](#)

For peer review only - <http://bmjopen.bmj.com/site/about/guidelines.xhtml>
